# Supplementary material for: Optimal searching behaviour generated intrinsically by the central pattern generator for locomotion
Source: eLife journal article supplement (doi:10.7554/elife.50316), 2019-11-01

Raw unprocessed

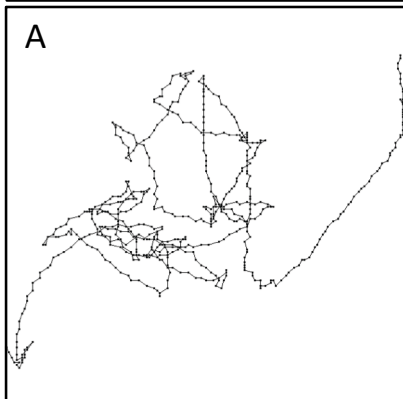

Position & velocity 0.5, covariance 1.0

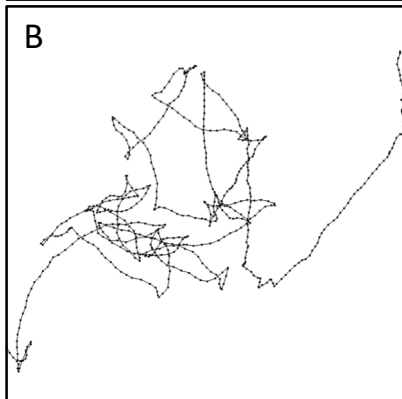

Position & velocity = 1.0

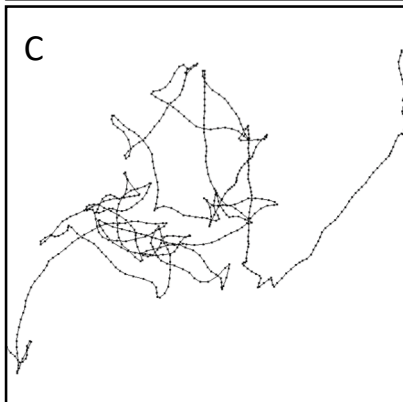

Position & velocity = 0.1

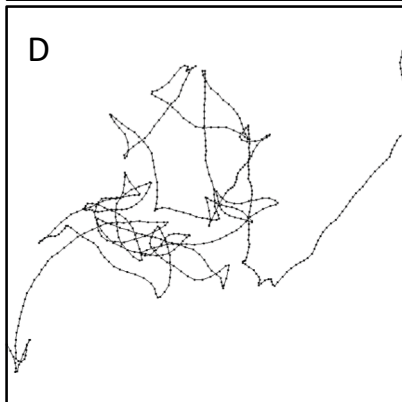

Position & velocity = 0.05

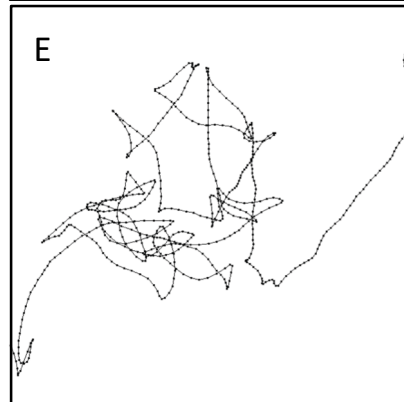

Minimum covariance = 2.0

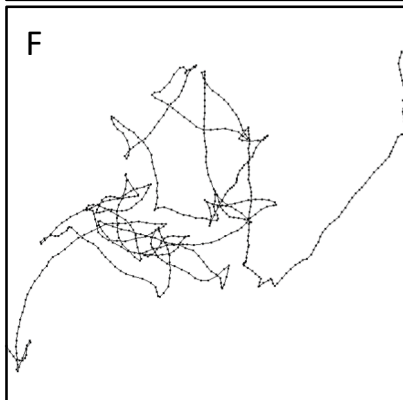

Minimum covariance = 0.5

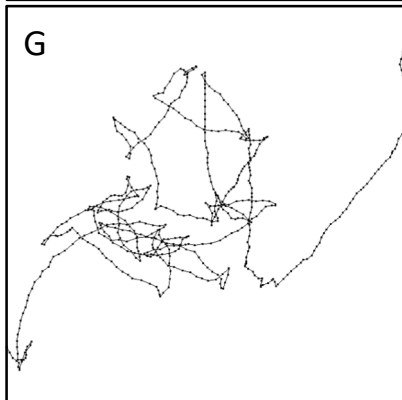

Minimum covariance = 0.1

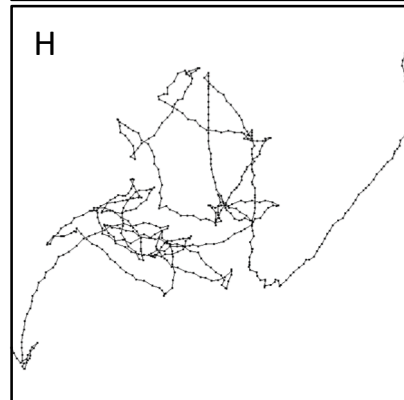

Supplement: supp [file elife-50316-supp-v1.zip]
