# Supplementary material for: Optimal searching behaviour generated intrinsically by the central pattern generator for locomotion
Source: eLife journal article supplement (doi:10.7554/elife.50316), 2019-11-01
Supplement: supp [file elife-50316-supp-v1.zip]

Archive with 12 entries (12 files):
- elife_poa_e50316_Supplementary_file_2.docx
- elife_poa_e50316_Figure_2_figure_supplement_2.pdf
- elife_poa_e50316_Supplementary_file_1.xlsx
- elife_poa_e50316_Transparent_Reporting_File.docx
- elife_poa_e50316_Supplementary_file_3.xlsx
- elife_poa_e50316_Supplementary_file_7.xlsx
- elife_poa_e50316_Figure_2_figure_supplement_3.pdf
- elife_poa_e50316_Supplementary_file_4.xlsx
- elife_poa_e50316_Figure_2_figure_supplement_1.pdf
- elife_poa_e50316_Supplementary_file_5.docx
- elife_poa_e50316_Supplementary_file_6.xlsx
- elife_poa_e50316_Figure_5_figure_supplement_1.pdf
