# Supplementary material for: Optimal searching behaviour generated intrinsically by the central pattern generator for locomotion
Source: eLife journal article supplement (doi:10.7554/elife.50316), 2019-11-01
Supplement: supp [file elife-50316-supp-v1.zip › elife_poa_e50316_Supplementary_file_1.xlsx]

## Sheet: Sheet 1
Supplementary File 1		Summary of tracks and model fits
					N tracks
T (oC)	Larvae type	Trial	N larvae	N Tracks	TP	E	U
22	BL/+	1	9	15	10	4	1
		2	9	9	7	1	1
		3	10	19	13	3	3
22	shi/+	1	10	14	12	1	1
		2	8	17	12	4	1
		3	7	12	10	1	1
33	BL/+	1	10	22	11	4	7
		2	10	9	7	0	2
		3	10	27	15	5	7
33	shi/+	1	10	12	8	1	3
		2	8	11	9	0	2
		3	7	8	6	1	1
		4	9	20	16	3	1
33	MB247/+	1	10	10	5	4	1
		2	7	11	9	1	1
		3	10	10	9	0	1
33	BL>shi	1	7	16	6	3	7
		2	6	15	7	3	5
		3	3	23	13	7	3
33	BLsens>shi	1	10	10	6	0	4
		2	10	11	5	2	4
		3	5	0	0	0	0
33	MB247>shi	1	9	11	7	2	2
		2	10	10	7	1	2
		3	10	10	9	1	0
22	BLsens>rpr, hid	1	20	37	26	4	7
		2	20	20	19	0	1
		3	10	10	9	1	0
		4	10	10	8	0	2
32	BLsens>rpr, hid	1	15	15	9	1	5
		2	15	15	7	1	7
		3	18	17	6	4	7
		4	15	15	1	4	10
Total		72	337	471	304	67	100
