# Supplementary material for: Optimal searching behaviour generated intrinsically by the central pattern generator for locomotion
Source: eLife journal article supplement (doi:10.7554/elife.50316), 2019-11-01
Supplement: supp [file elife-50316-supp-v1.zip › elife_poa_e50316_Supplementary_file_3.xlsx]

## Sheet: Sheet1
Supplementary File 3 MLE Analysis - TP results
ToC	Treatment (Trial)	TrackFileName	Steps	TP Xmin	TP Exponent	TP Xmax	TP AICw	TP Alt AICw	KS-p	Fitted steps	Decades
22	BL/+ 22 Deg (n1)	BL-+_n1_22deg (1)	418	0.487097	1.16553	25.2291	0.96	0.04	0.842	22	1.71429
22	BL/+ 22 Deg (n1)	BL-+_n1_22deg (13)	752	0.583225	1.44313	28.1564	1	0	0.4444	35	1.68374
22	BL/+ 22 Deg (n1)	BL-+_n1_22deg (14)	493	0.451713	1.4905	17.3559	1	0	0.3836	30	1.58458
22	BL/+ 22 Deg (n1)	BL-+_n1_22deg (17)	1367	0.450478	1.18504	13.2687	1	0	0.6228	68	1.46916
22	BL/+ 22 Deg (n1)	BL-+_n1_22deg (19)	562	0.579202	1.4507	17.2986	1	0	0.976	33	1.47518
22	BL/+ 22 Deg (n1)	BL-+_n1_22deg (2)	7359	0.469318	2.04683	9.91939	1	0	0.918	51	1.32502
22	BL/+ 22 Deg (n1)	BL-+_n1_22deg (4)	1327	0.44333	1.11978	28.8734	1	0	0.2128	50	1.81377
22	BL/+ 22 Deg (n1)	BL-+_n1_22deg (6)	1579	0.448348	1.00842	42.9301	1	0	0.9212	55	1.98115
22	BL/+ 22 Deg (n1)	BL-+_n1_22deg (7)	5141	0.444159	1.25003	28.9066	1	0	0.0568	223	1.81346
22	BL/+ 22 Deg (n1)	BL-+_n1_22deg (8)	5852	0.467586	1.46864	36.2298	1	0	0	157	1.8892
22	BL/+ 22 Deg (n2)	BL-+_n2_22deg (0)	4266	0.458725	1.17296	112.107	1	0	0.6496	101	2.38808
22	BL/+ 22 Deg (n2)	BL-+_n2_22deg (1)	1885	0.442246	1.73175	5.31273	1	0	0.984	79	1.07965
22	BL/+ 22 Deg (n2)	BL-+_n2_22deg (3)	2622	0.448013	1.03142	43.8485	1	0	0.1712	82	1.99066
22	BL/+ 22 Deg (n2)	BL-+_n2_22deg (4)	8185	0.524506	1.34793	49.6888	1	0	0.0224	314	1.97651
22	BL/+ 22 Deg (n2)	BL-+_n2_22deg (5)	8094	0.440597	1.62108	20.3164	1	0	0.7408	553	1.6638
22	BL/+ 22 Deg (n2)	BL-+_n2_22deg (8)	2844	0.554249	1.08348	27.2121	1	0	0.0408	114	1.69106
22	BL/+ 22 Deg (n2)	BL-+_n2_22deg (9)	8205	0.566132	1.90609	54.1276	1	0	0.2748	390	1.9805
22	BL/+ 22 Deg (n3)	BL-+_n3_22deg (1)	6660	8.3547	2.27179	25.8224	0.96	0.04	0.966	68	0.490065
22	BL/+ 22 Deg (n3)	BL-+_n3_22deg (112)	3117	0.449799	1.74204	6.07623	1	0	0.5764	115	1.13061
22	BL/+ 22 Deg (n3)	BL-+_n3_22deg (131)	184	0.555941	1.01866	16.073	0.56	0.44	0.2164	9	1.46107
22	BL/+ 22 Deg (n3)	BL-+_n3_22deg (135)	252	0.646938	1.02296	18.4405	0.58	0.42	0.2852	10	1.45491
22	BL/+ 22 Deg (n3)	BL-+_n3_22deg (136)	2412	0.443357	1.38833	66.2971	1	0	0.3404	109	2.17474
22	BL/+ 22 Deg (n3)	BL-+_n3_22deg (141)	424	3.55431	1.96047	94.6911	0.82	0.18	0.8616	7	1.42555
22	BL/+ 22 Deg (n3)	BL-+_n3_22deg (143)	1400	0.53168	1.44346	115.852	1	0	0.2796	53	2.33825
22	BL/+ 22 Deg (n3)	BL-+_n3_22deg (163)	499	0.56367	1.00132	26.4713	0.96	0.04	0.1864	20	1.67175
22	BL/+ 22 Deg (n3)	BL-+_n3_22deg (2)	6660	0.442765	1.79421	23.0473	1	0	0.4992	57	1.71645
22	BL/+ 22 Deg (n3)	BL-+_n3_22deg (4)	2582	0.465989	1.94638	7.87155	1	0	0.7544	57	1.22768
22	BL/+ 22 Deg (n3)	BL-+_n3_22deg (5)	2714	0.442404	1.3628	39.55	1	0	0.0224	135	1.95133
22	BL/+ 22 Deg (n3)	BL-+_n3_22deg (6)	6660	0.444546	1.28373	12.9218	1	0	0.062	387	1.46341
22	BL/+ 22 Deg (n3)	BL-+_n3_22deg (7)	6636	0.581006	2.0533	3.72171	0.6	0.4	0.6336	39	0.806562
22	BL/+ 22 Deg (n3)	BL-+_n3_22deg (8)	1638	0.549692	1.37455	22.4604	1	0	0.9308	32	1.6113
22	shi/+ 22 Deg (n1)	shi-+_n1_22deg (0)	805	0.475842	1.38892	53.23	1	0	0.2468	25	2.04869
22	shi/+ 22 Deg (n1)	shi-+_n1_22deg (1)	911	0.451832	1.2722	24.5174	1	0	0.1368	24	1.7345
22	shi/+ 22 Deg (n1)	shi-+_n1_22deg (19)	789	0.506495	1.44999	16.0235	1	0	0.424	29	1.50018
22	shi/+ 22 Deg (n1)	shi-+_n1_22deg (2)	911	0.526002	1.45799	39.3555	1	0	0.0572	32	1.87402
22	shi/+ 22 Deg (n1)	shi-+_n1_22deg (22)	1364	1.5629	1.35234	77.7707	0.99	0.01	0.874	24	1.69688
22	shi/+ 22 Deg (n1)	shi-+_n1_22deg (3)	2579	0.780155	1.86497	19.1523	1	0	0.6704	79	1.39004
22	shi/+ 22 Deg (n1)	shi-+_n1_22deg (30)	1120	0.441661	1.26779	77.1225	1	0	0.0816	33	2.24209
22	shi/+ 22 Deg (n1)	shi-+_n1_22deg (4)	4137	0.442396	1.59975	21.0818	1	0	0.0972	253	1.6781
22	shi/+ 22 Deg (n1)	shi-+_n1_22deg (5)	7341	0.441639	1.40245	11.5738	1	0	0.4596	163	1.41841
22	shi/+ 22 Deg (n1)	shi-+_n1_22deg (6)	7342	0.779745	2.29818	16.998	1	0	0.1524	185	1.33845
22	shi/+ 22 Deg (n1)	shi-+_n1_22deg (7)	5539	1.42875	1.58096	15.2688	1	0	0.9424	103	1.02885
22	shi/+ 22 Deg (n1)	shi-+_n1_22deg (8)	7326	0.440565	1.3123	16.5727	1	0	0.1412	320	1.57538
22	shi/+ 22 Deg (n2)	shi-+_n2_22deg (0)	564	0.448059	1.4176	22.2079	0.99	0.01	0.866	21	1.69517
22	shi/+ 22 Deg (n2)	shi-+_n2_22deg (1)	7300	0.444174	2.78604	1.78823	0.76	0.24	0.4564	36	0.60487
22	shi/+ 22 Deg (n2)	shi-+_n2_22deg (11)	209	0.544468	1.09889	7.17288	0.8	0.2	0	10	1.11972
22	shi/+ 22 Deg (n2)	shi-+_n2_22deg (12)	5982	0.446681	1.64306	27.0412	1	0	0.0168	259	1.78203
22	shi/+ 22 Deg (n2)	shi-+_n2_22deg (16)	349	0.458033	1.31404	15.2541	0.93	0.07	0.3064	10	1.52249
22	shi/+ 22 Deg (n2)	shi-+_n2_22deg (18)	1214	0.553316	1.39581	20.8565	1	0	0.1736	45	1.57627
22	shi/+ 22 Deg (n2)	shi-+_n2_22deg (2)	6334	0.502068	1.32987	6.65227	0.72	0.28	0.0256	20	1.12221
22	shi/+ 22 Deg (n2)	shi-+_n2_22deg (27)	4084	0.468096	1.39472	27.2301	1	0	0	177	1.76471
22	shi/+ 22 Deg (n2)	shi-+_n2_22deg (30)	268	0.488399	1.26713	8.23921	0.52	0.48	0.4812	16	1.22711
22	shi/+ 22 Deg (n2)	shi-+_n2_22deg (31)	2179	0.655175	1.69034	20.3593	1	0	0.2492	74	1.49241
22	shi/+ 22 Deg (n2)	shi-+_n2_22deg (4)	2096	0.454051	1.18064	20.2564	1	0	0.0772	77	1.64946
22	shi/+ 22 Deg (n2)	shi-+_n2_22deg (9)	7300	0.594985	1.03316	9.9699	0.95	0.05	0.6724	39	1.22419
22	shi/+ 22 Deg (n3)	shi-+_n3_22deg (0)	7200	1.36089	2.01669	20.9268	0.92	0.08	0.7964	81	1.18688
22	shi/+ 22 Deg (n3)	shi-+_n3_22deg (1)	1027	0.579932	1.13544	45.7308	1	0	0.6304	18	1.89683
22	shi/+ 22 Deg (n3)	shi-+_n3_22deg (12)	469	0.508785	1.52347	16.7614	0.99	0.01	0.0728	21	1.51778
22	shi/+ 22 Deg (n3)	shi-+_n3_22deg (124)	1003	0.466847	1.62383	16.757	1	0	0.0596	49	1.55502
22	shi/+ 22 Deg (n3)	shi-+_n3_22deg (16)	5348	0.441793	1.4073	21.1495	1	0	0.4108	208	1.68008
22	shi/+ 22 Deg (n3)	shi-+_n3_22deg (17)	303	0.454182	1.07847	11.9208	0.74	0.26	0.566	13	1.41908
22	shi/+ 22 Deg (n3)	shi-+_n3_22deg (2)	3030	0.456028	1.36221	18.0598	1	0	0.012	130	1.59772
22	shi/+ 22 Deg (n3)	shi-+_n3_22deg (3)	7166	0.457469	1.29737	7.69174	1	0	0.1324	104	1.22566
22	shi/+ 22 Deg (n3)	shi-+_n3_22deg (8)	7200	0.466349	1.89994	10.2417	1	0	0.6928	198	1.34166
22	shi/+ 22 Deg (n3)	shi-+_n3_22deg (9)	7200	0.447971	1.3925	28.0395	1	0	0.0384	297	1.79652
33	BL/+ 33 Deg (n1)	1_DROS_DEC2014 (1)	1232	0.579671	1.01948	143.132	1	0	0.9288	24	2.39255
33	BL/+ 33 Deg (n1)	1_DROS_DEC2014 (3)	7278	0.447213	1.44836	13.6584	1	0	0.3496	441	1.48489
33	BL/+ 33 Deg (n1)	1_DROS_DEC2014 (4)	3157	11.358	1.2547	34.9745	1	0	0.8704	55	0.488452
33	BL/+ 33 Deg (n1)	1_DROS_DEC2014 (5)	2428	0.457891	1.12153	26.467	1	0	0.58	147	1.76194
33	BL/+ 33 Deg (n1)	1_DROS_DEC2014 (542)	468	0.449587	1.09848	8.64291	0.88	0.12	0.9508	22	1.28385
33	BL/+ 33 Deg (n1)	1_DROS_DEC2014 (549)	492	0.488347	1.28906	39.2056	1	0	0.8248	21	1.90462
33	BL/+ 33 Deg (n1)	1_DROS_DEC2014 (551)	485	0.628487	1.29952	14.1718	0.74	0.26	0.546	33	1.35313
33	BL/+ 33 Deg (n1)	1_DROS_DEC2014 (563)	2006	0.4412	1.34733	21.4371	1	0	0.236	125	1.68653
33	BL/+ 33 Deg (n1)	1_DROS_DEC2014 (584)	1009	0.454991	1.28508	26.6955	1	0	0.576	61	1.76843
33	BL/+ 33 Deg (n1)	1_DROS_DEC2014 (6)	831	2.1699	2.20941	12.0925	0.58	0.42	0.976	28	0.746077
33	BL/+ 33 Deg (n1)	1_DROS_DEC2014 (9)	2698	0.477358	1.17009	10.5105	1	0	0.6712	167	1.34278
33	BL/+ 33 Deg (n2)	1A_DROS_BL-+_n2 (1)	6019	0.472049	1.07546	26.0758	1	0	0.0104	300	1.74225
33	BL/+ 33 Deg (n2)	1A_DROS_BL-+_n2 (2)	4279	0.460901	1.0991	88.0285	1	0	0.0312	153	2.28102
33	BL/+ 33 Deg (n2)	1A_DROS_BL-+_n2 (4)	5743	0.450213	1.31547	21.2993	1	0	0.0036	283	1.67495
33	BL/+ 33 Deg (n2)	1A_DROS_BL-+_n2 (5)	788	0.58133	1.04055	61.5038	1	0	0	41	2.02448
33	BL/+ 33 Deg (n2)	1A_DROS_BL-+_n2 (6)	2708	2.43101	1.42848	12.9179	0.99	0.01	1	77	0.725405
33	BL/+ 33 Deg (n2)	1A_DROS_BL-+_n2 (7)	134	1.99898	1.5903	173.112	0.86	0.14	0.7692	6	1.93752
33	BL/+ 33 Deg (n2)	1A_DROS_BL-+_n2 (8)	2265	8.00639	2.27208	95.5904	1	0	0.458	52	1.07698
33	BL/+ 33 Deg (n2)	1A_DROS_BL-+_n2 (9)	3078	0.628867	1.08639	67.7497	1	0	0.2608	141	2.03235
33	BL/+ 33 Deg (n3)	1B_DROS_BL-+_n3 (0)	686	2.72084	1.46545	26.0584	0.65	0.35	0.5028	17	0.981244
33	BL/+ 33 Deg (n3)	1B_DROS_BL-+_n3 (14)	1063	1.26387	1.37621	19.6306	0.88	0.12	1	34	1.19123
33	BL/+ 33 Deg (n3)	1B_DROS_BL-+_n3 (18)	7235	0.580998	1.03116	21.7374	1	0	0.0644	288	1.57303
33	BL/+ 33 Deg (n3)	1B_DROS_BL-+_n3 (2)	6034	0.488262	1.12415	6.87796	1	0	0.978	203	1.14881
33	BL/+ 33 Deg (n3)	1B_DROS_BL-+_n3 (22)	2508	0.538462	1.12999	36.5329	1	0	0.5864	106	1.83153
33	BL/+ 33 Deg (n3)	1B_DROS_BL-+_n3 (23)	397	0.577253	1.54199	126.332	1	0	0.7476	14	2.34015
33	BL/+ 33 Deg (n3)	1B_DROS_BL-+_n3 (29)	4005	0.443852	1.16644	32.0468	1	0	0.158	170	1.85855
33	BL/+ 33 Deg (n3)	1B_DROS_BL-+_n3 (53)	348	0.44039	1.10229	15.4862	0.92	0.08	0.8804	20	1.54611
33	BL/+ 33 Deg (n3)	1B_DROS_BL-+_n3 (58)	2095	0.444562	1.34514	14.376	1	0	0.6492	90	1.50971
33	BL/+ 33 Deg (n3)	1B_DROS_BL-+_n3 (61)	1670	0.515333	1.22542	12.1483	1	0	0.8564	90	1.37243
33	BL/+ 33 Deg (n3)	1B_DROS_BL-+_n3 (66)	1255	0.445407	1.34186	10.8037	1	0	0.3568	53	1.38482
33	BL/+ 33 Deg (n3)	1B_DROS_BL-+_n3 (67)	860	0.925452	1.24413	21.4283	0.99	0.01	0.6228	42	1.36463
33	BL/+ 33 Deg (n3)	1B_DROS_BL-+_n3 (68)	388	0.461037	1.8415	12.0998	1	0	0.9352	27	1.41904
33	BL/+ 33 Deg (n3)	1B_DROS_BL-+_n3 (7)	8149	0.615657	1.73738	2.8206	1	0	0.7008	122	0.661003
33	BL/+ 33 Deg (n3)	1B_DROS_BL-+_n3 (9)	8149	0.442941	1.88375	2.40265	1	0	0.334	160	0.734345
33	BLsens-shi (n1)	2_DROS_DEC2014 (10)	6978	0.545032	2.64319	3.89006	0.96	0.04	0.5508	87	0.853534
33	BLsens-shi (n1)	2_DROS_DEC2014 (12)	6386	0.6304	1.84802	13.781	1	0	0.2616	144	1.33967
33	BLsens-shi (n1)	2_DROS_DEC2014 (15)	6978	0.451819	2.28973	11.967	1	0	0.1948	392	1.42302
33	BLsens-shi (n1)	2_DROS_DEC2014 (16)	6978	0.450077	1.85275	7.9283	1	0	0	164	1.24589
33	BLsens-shi (n1)	2_DROS_DEC2014 (18)	6344	0.777102	2.5803	19.2985	1	0	0.324	101	1.39505
33	BLsens-shi (n1)	2_DROS_DEC2014 (19)	6978	0.465759	2.87853	3.0486	0.97	0.03	0.9268	66	0.81594
33	BLsens-shi (n1)	2_DROS_DEC2014 (355)	320	0.499827	1.93271	4.18208	0.72	0.28	0	17	0.922573
33	BLsens-shi (n2)	2A_DROS_BLsens-shi_n2 (1)	8433	0.55804	1.35461	3.60721	0.63	0.37	0.7104	18	0.810505
33	BLsens-shi (n2)	2A_DROS_BLsens-shi_n2 (2)	8433	0.513449	1.83593	11.6078	0.92	0.08	0.6016	39	1.35425
33	BLsens-shi (n2)	2A_DROS_BLsens-shi_n2 (6)	8433	0.47558	1.89173	12.0354	1	0	0.0292	80	1.40324
33	BLsens-shi (n2)	2A_DROS_BLsens-shi_n2 (7)	8433	0.454993	1.74793	5.98038	0.89	0.11	0.6116	34	1.11872
33	BLsens-shi (n2)	2A_DROS_BLsens-shi_n2 (9)	8433	0.585757	1.61295	11.6473	0.99	0.01	0.4692	58	1.29851
33	BL-shi (n1)	3_DROS_DEC2014 (0)	7224	0.447839	1.74918	5.98149	1	0	0	407	1.12569
33	BL-shi (n1)	3_DROS_DEC2014 (1)	7224	0.531739	2.17636	13.4562	1	0	0.8028	579	1.40322
33	BL-shi (n1)	3_DROS_DEC2014 (25)	246	0.550764	1.09723	6.79206	0.62	0.38	0.16	22	1.09104
33	BL-shi (n1)	3_DROS_DEC2014 (2626)	128	0.504804	1.51672	6.93717	0.84	0.16	0.1128	11	1.13806
33	BL-shi (n1)	3_DROS_DEC2014 (2874)	132	0.615867	1.27879	5.39574	0.55	0.45	0.4048	14	0.942564
33	BL-shi (n1)	3_DROS_DEC2014 (326)	660	0.448051	2.2526	3.84337	0.98	0.02	0.986	82	0.933385
33	BL-shi (n1)	3_DROS_DEC2014 (4)	7224	0.461661	2.73377	1.67391	0.56	0.44	0.9156	27	0.55941
33	BL-shi (n1)	3_DROS_DEC2014 (5)	491	0.453601	1.54767	4.94554	0.94	0.06	0.4016	58	1.03754
33	BL-shi (n2)	4_DROS_DEC2014 (0)	5245	0.451827	1.58459	11.1157	1	0	0.8268	329	1.39096
33	BL-shi (n2)	4_DROS_DEC2014 (5)	7410	0.440777	1.41966	15.0128	1	0	0.27	408	1.53224
33	BL-shi (n2)	4_DROS_DEC2014 (519)	433	0.449501	1.11612	17.9114	0.99	0.01	0.134	32	1.6004
33	BL-shi (n2)	4_DROS_DEC2014 (534)	422	0.569775	1.51298	36.0616	1	0	0.9636	27	1.80134
33	BL-shi (n2)	4_DROS_DEC2014 (535)	532	0.570789	1.09551	20.3481	0.83	0.17	0.9032	22	1.55205
33	BL-shi (n2)	4_DROS_DEC2014 (7)	5026	0.44164	1.25475	9.80112	1	0	0.878	368	1.34621
33	BL-shi (n2)	4_DROS_DEC2014 (8)	3753	0.441712	1.17613	24.9038	1	0	0.0844	248	1.75113
33	BL-shi (n3)	5_DROS_BL-shi_n3 (10)	7798	5.18601	1.85461	24.2347	1	0	0.2256	192	0.669603
33	BL-shi (n3)	5_DROS_BL-shi_n3 (15)	7735	1.03873	2.12926	7.54751	1	0	0.1608	617	0.8613
33	BL-shi (n3)	5_DROS_BL-shi_n3 (2)	6602	2.49249	1.6881	10.3354	1	0	0.9008	218	0.617692
33	BL-shi (n3)	5_DROS_BL-shi_n3 (203)	1967	4.46429	2.00123	9.68738	0.99	0.01	0.7188	48	0.336454
33	BL-shi (n3)	5_DROS_BL-shi_n3 (209)	7767	0.440391	2.19369	2.84854	1	0	0.0216	257	0.810784
33	BL-shi (n3)	5_DROS_BL-shi_n3 (24)	7804	0.908784	2.82029	5.69155	1	0	0.264	285	0.79677
33	BL-shi (n3)	5_DROS_BL-shi_n3 (467)	3391	0.442908	1.35949	14.7587	1	0	0.0224	235	1.52273
33	BL-shi (n3)	5_DROS_BL-shi_n3 (474)	414	0.473656	1.62878	3.55377	0.72	0.28	0.7004	24	0.875226
33	BL-shi (n3)	5_DROS_BL-shi_n3 (482)	244	0.440916	1.00631	8.02815	0.89	0.11	0.1208	16	1.26026
33	BL-shi (n3)	5_DROS_BL-shi_n3 (496)	504	2.27759	1.79224	14.5734	0.61	0.39	0.8176	24	0.806085
33	BL-shi (n3)	5_DROS_BL-shi_n3 (549)	216	0.495107	1.19326	9.44925	0.52	0.48	0.236	10	1.2807
33	BL-shi (n3)	5_DROS_BL-shi_n3 (557)	328	0.441709	1.04764	19.4856	0.96	0.04	0.6188	16	1.64458
33	BL-shi (n3)	5_DROS_BL-shi_n3 (81)	7794	0.444746	1.78297	8.02793	1	0	0.0144	438	1.25649
33	shi/+ 33 Deg (n1)	Shi-+_n1_33degsmaller scale (0)	7332	12.9351	2.47594	47.8698	0.89	0.11	0.9816	77	0.568292
33	shi/+ 33 Deg (n1)	Shi-+_n1_33degsmaller scale (1)	3713	0.497172	1.0386	59.5729	1	0	0.2956	114	2.07854
33	shi/+ 33 Deg (n1)	Shi-+_n1_33degsmaller scale (3)	6502	0.467876	1.54523	26.3137	1	0	0.776	184	1.75005
33	shi/+ 33 Deg (n1)	Shi-+_n1_33degsmaller scale (4)	7332	0.440151	1.29929	19.4283	1	0	0.6572	347	1.64483
33	shi/+ 33 Deg (n1)	Shi-+_n1_33degsmaller scale (5)	7332	1.2504	1.83667	24.9595	0.97	0.03	0.8752	89	1.30019
33	shi/+ 33 Deg (n1)	Shi-+_n1_33degsmaller scale (6)	2926	0.752715	1.08298	30.0733	1	0	0.976	96	1.60155
33	shi/+ 33 Deg (n1)	Shi-+_n1_33degsmaller scale (8)	7332	0.453867	1.85679	6.66825	0.73	0.27	0.65	17	1.16708
33	shi/+ 33 Deg (n1)	Shi-+_n1_33degsmaller scale (9)	7332	0.441209	1.43702	18.7685	1	0	0.6364	279	1.62879
33	shi/+ 33 Deg (n2)	shi-+_n2_33 (0)	7000	0.447728	1.34659	13.6443	1	0	0.0924	349	1.48394
33	shi/+ 33 Deg (n2)	shi-+_n2_33 (1)	2538	0.448518	1.10061	24.5508	1	0	0.7432	81	1.73829
33	shi/+ 33 Deg (n2)	shi-+_n2_33 (4)	7226	0.453543	1.39042	16.5185	1	0	0	189	1.56135
33	shi/+ 33 Deg (n2)	shi-+_n2_33 (5)	1762	0.885986	1.40096	45.5446	1	0	0.8124	42	1.71101
33	shi/+ 33 Deg (n2)	shi-+_n2_33 (51)	3316	0.495024	1.48323	31.4411	1	0	0.3936	76	1.80287
33	shi/+ 33 Deg (n2)	shi-+_n2_33 (6)	2700	0.443602	1.0242	13.0587	1	0	0.9572	117	1.46891
33	shi/+ 33 Deg (n2)	shi-+_n2_33 (7)	7222	0.44943	1.48652	11.8277	1	0	0.0056	185	1.42024
33	shi/+ 33 Deg (n2)	shi-+_n2_33 (71)	991	0.459912	2.29893	3.44353	0.73	0.27	0.7464	19	0.874329
33	shi/+ 33 Deg (n2)	shi-+_n2_33 (8)	1665	2.28949	1.92247	42.9767	1	0	0.9796	37	1.27349
33	shi/+ 33 Deg (n3)	shi-+_n3 (0)	7831	4.00696	2.55933	36.9852	0.99	0.01	1	76	0.965213
33	shi/+ 33 Deg (n3)	shi-+_n3 (1)	7833	2.52302	2.56954	41.0754	1	0	0.3044	98	1.21166
33	shi/+ 33 Deg (n3)	shi-+_n3 (3)	7698	0.782536	1.35234	18.3796	1	0	0.5224	237	1.37083
33	shi/+ 33 Deg (n3)	shi-+_n3 (4)	1675	0.460316	1.32358	26.1572	1	0	0.2556	54	1.75454
33	shi/+ 33 Deg (n3)	shi-+_n3 (5)	7583	0.445493	1.31025	6.70657	1	0	0.6684	303	1.17766
33	shi/+ 33 Deg (n3)	shi-+_n3 (6)	685	0.556593	1.50336	11.8338	0.87	0.13	0.2696	45	1.32759
33	shi/+ 33 Deg (n4)	shi-+_n4_33deg (1)	1119	0.46537	1.20189	29.7532	1	0	0.7412	40	1.80574
33	shi/+ 33 Deg (n4)	shi-+_n4_33deg (10)	885	0.454473	1.3398	47.3314	1	0	0.908	46	2.01764
33	shi/+ 33 Deg (n4)	shi-+_n4_33deg (2)	3564	0.601336	1.16066	19.4	1	0	0.852	145	1.50869
33	shi/+ 33 Deg (n4)	shi-+_n4_33deg (20)	201	0.460545	1.13263	9.60383	0.51	0.49	0.9036	21	1.31917
33	shi/+ 33 Deg (n4)	shi-+_n4_33deg (22)	2317	1.16163	1.46066	49.6232	1	0	0.924	58	1.63062
33	shi/+ 33 Deg (n4)	shi-+_n4_33deg (25)	634	0.44651	1.4414	65.1892	1	0	0.8524	22	2.16434
33	shi/+ 33 Deg (n4)	shi-+_n4_33deg (3)	3601	0.488938	1.21176	29.45	1	0	0.1084	141	1.77983
33	shi/+ 33 Deg (n4)	shi-+_n4_33deg (36)	1650	1.0067	2.20815	12.0319	0.66	0.34	0.8652	9	1.07744
33	shi/+ 33 Deg (n4)	shi-+_n4_33deg (4)	1862	1.35559	1.69564	60.9767	1	0	0.5996	62	1.65304
33	shi/+ 33 Deg (n4)	shi-+_n4_33deg (40)	307	0.44364	1.32869	15.2779	0.91	0.09	0.21	11	1.53703
33	shi/+ 33 Deg (n4)	shi-+_n4_33deg (42)	243	0.474509	1.10356	13.1337	0.78	0.22	0.5672	15	1.44214
33	shi/+ 33 Deg (n4)	shi-+_n4_33deg (43)	910	0.502139	1.40284	161.382	1	0	0.7	21	2.50703
33	shi/+ 33 Deg (n4)	shi-+_n4_33deg (44)	192	0.459018	1.22591	17.0403	0.82	0.18	0.6248	10	1.56965
33	shi/+ 33 Deg (n4)	shi-+_n4_33deg (49)	652	0.669489	1.74356	9.02425	0.96	0.04	0.8372	46	1.12967
33	shi/+ 33 Deg (n4)	shi-+_n4_33deg (5)	1042	0.453481	1.50382	33.4567	1	0	0.3576	54	1.86792
33	shi/+ 33 Deg (n4)	shi-+_n4_33deg (6)	3601	0.473432	1.34282	37.8993	1	0	0.4136	90	1.90337
33	shi/+ 33 Deg (n4)	shi-+_n4_33deg (8)	1895	2.70077	2.26875	37.4504	1	0	0.902	54	1.14197
33	MB247/+ (n1)	MB247-+_n1 (4)	7310	0.440434	2.48854	3.52961	0.97	0.03	0.7348	56	0.903846
33	MB247/+ (n1)	MB247-+_n1 (5)	7345	0.440995	2.22451	49.1887	1	0	0.2624	359	2.04743
33	MB247/+ (n1)	MB247-+_n1 (6)	5847	2.12345	1.77778	37.5078	1	0	0.9284	163	1.24708
33	MB247/+ (n1)	MB247-+_n1 (8)	7345	0.446444	1.67746	3.29279	1	0	0.8992	308	0.867797
33	MB247/+ (n1)	MB247-+_n1 (9)	7345	0.441924	1.57889	11.1872	1	0	0.5688	247	1.40338
33	MB247/+ (n2)	MB247-+_n2 (12)	553	1.95467	1.62982	30.017	0.92	0.08	0.9224	28	1.18629
33	MB247/+ (n2)	MB247-+_n2 (13)	1346	0.705748	1.52138	10.2097	0.97	0.03	0.4652	65	1.16036
33	MB247/+ (n2)	MB247-+_n2 (14)	224	2.99736	2.86626	25.765	0.73	0.27	0.8424	9	0.934291
33	MB247/+ (n2)	MB247-+_n2 (3)	5202	0.440006	1.53799	21.9272	1	0	0.296	233	1.69752
33	MB247/+ (n2)	MB247-+_n2 (4)	6066	0.509176	1.85217	11.2709	1	0	0.6248	192	1.34509
33	MB247/+ (n2)	MB247-+_n2 (450)	595	0.44202	1.36371	27.8262	1	0	0.042	49	1.79901
33	MB247/+ (n2)	MB247-+_n2 (5)	6135	2.25098	1.30854	7.78116	1	0	0.5712	168	0.538674
33	MB247/+ (n2)	MB247-+_n2 (6)	7205	0.683795	1.52372	10.4727	1	0	0.8552	288	1.18514
33	MB247/+ (n2)	MB247-+_n2 (631)	295	0.477006	1.73518	15.6136	1	0	0.6372	31	1.51498
33	MB247/+ (n3)	MB247-+_n3 (0)	5014	0.455962	1.60308	2.94196	0.54	0.46	0.7032	41	0.809708
33	MB247/+ (n3)	MB247-+_n3 (1)	5038	3.43908	1.98053	12.0997	0.92	0.08	1	59	0.546334
33	MB247/+ (n3)	MB247-+_n3 (2)	3530	0.442719	1.18309	39.1936	1	0	0.204	212	1.94709
33	MB247/+ (n3)	MB247-+_n3 (3)	4938	1.71554	2.30141	51.6688	1	0	0.3792	100	1.47883
33	MB247/+ (n3)	MB247-+_n3 (4)	2363	0.472139	1.2448	36.3899	1	0	0.0932	123	1.88691
33	MB247/+ (n3)	MB247-+_n3 (5)	817	0.548624	1.01153	55.2502	1	0	0.0168	55	2.00306
33	MB247/+ (n3)	MB247-+_n3 (6)	5029	0.441656	1.57326	7.56751	1	0	0.39	210	1.23387
33	MB247/+ (n3)	MB247-+_n3 (8)	2733	0.48382	1.38597	13.6899	1	0	0.2648	181	1.45172
33	MB247/+ (n3)	MB247-+_n3 (9)	926	4.59875	2.68521	93.7906	1	0	0.98	32	1.30952
33	MB247-shi (n1)	MB247-shi-n1 (0)	1651	0.442892	1.12234	66.0845	1	0	0.9468	62	2.1738
33	MB247-shi (n1)	MB247-shi-n1 (1)	2078	0.683651	2.11982	11.8593	1	0	0.934	64	1.23923
33	MB247-shi (n1)	MB247-shi-n1 (2)	7203	0.514816	1.63249	4.47416	0.6	0.4	0.562	15	0.939059
33	MB247-shi (n1)	MB247-shi-n1 (4)	675	0.532035	1.11717	65.8691	1	0	0.6916	32	2.09274
33	MB247-shi (n1)	MB247-shi-n1 (5)	6084	4.04618	2.11036	36.0519	1	0	0.9672	126	0.949883
33	MB247-shi (n1)	MB247-shi-n1 (6)	3238	0.900541	1.41153	86.5958	1	0	0.514	141	1.98299
33	MB247-shi (n1)	MB247-shi-n1 (9)	3848	5.27233	1.88047	40.0933	0.93	0.07	0.8756	87	0.881069
33	MB247-shi (n2)	MB247-shi-n2 (0)	8995	0.620841	1.45821	18.3781	1	0	0.2192	176	1.47132
33	MB247-shi (n2)	MB247-shi-n2 (1)	9014	0.448137	1.33173	4.09677	1	0	0.9792	284	0.961031
33	MB247-shi (n2)	MB247-shi-n2 (3)	8526	0.869383	1.95288	62.5774	1	0	0.0224	205	1.85721
33	MB247-shi (n2)	MB247-shi-n2 (4)	3756	3.50962	1.92395	84.4266	1	0	0.8892	57	1.38122
33	MB247-shi (n2)	MB247-shi-n2 (5)	1190	0.587228	1.03574	56.7113	1	0	0	53	1.98486
33	MB247-shi (n2)	MB247-shi-n2 (7)	9013	0.440111	1.16599	22.8825	1	0	0.6784	341	1.71594
33	MB247-shi (n2)	MB247-shi-n2 (8)	8952	0.444242	1.70227	5.96898	1	0	0.14	296	1.12828
33	MB247-shi (n3)	MB247-shi-n3 (0)	5238	0.778924	1.62059	42.1747	1	0	0.4404	18	1.73356
33	MB247-shi (n3)	MB247-shi-n3 (1)	908	1.07806	1.44691	44.9248	1	0	0.8736	48	1.61984
33	MB247-shi (n3)	MB247-shi-n3 (2)	5098	1.15084	1.68101	7.53561	0.97	0.03	0.672	113	0.816104
33	MB247-shi (n3)	MB247-shi-n3 (3)	5201	1.82418	2.25787	15.2255	1	0	0.4984	95	0.921504
33	MB247-shi (n3)	MB247-shi-n3 (4)	5236	0.440147	1.51796	5.50142	1	0	0.21	177	1.09688
33	MB247-shi (n3)	MB247-shi-n3 (5)	1673	1.6424	1.17362	21.2375	1	0	0.8764	100	1.11162
33	MB247-shi (n3)	MB247-shi-n3 (6)	5230	2.0425	1.57252	9.62916	1	0	0.1808	221	0.673426
33	MB247-shi (n3)	MB247-shi-n3 (8)	965	1.0428	1.27104	39.2284	1	0	0.4696	55	1.5754
33	MB247-shi (n3)	MB247-shi-n3 (9)	1343	0.459199	1.26935	19.309	1	0	0.2004	95	1.62376
22	New Blsens-rprhid_control (n1)	newBL-rprhidcontrol-1 (0)	3502	0.451007	1.93722	34.3751	1	0	0.0908	342	1.88206
22	New Blsens-rprhid_control (n1)	newBL-rprhidcontrol-1 (1)	1058	1.94107	1.50243	21.1544	0.87	0.13	0.7212	45	1.03736
22	New Blsens-rprhid_control (n1)	newBL-rprhidcontrol-1 (106)	1276	0.532784	1.4452	71.0848	1	0	0.9628	61	2.12523
22	New Blsens-rprhid_control (n1)	newBL-rprhidcontrol-1 (110)	580	0.491111	1.0507	53.739	1	0	0.332	22	2.03911
22	New Blsens-rprhid_control (n1)	newBL-rprhidcontrol-1 (119)	456	0.488577	2.31443	18.0808	1	0	0.7528	8	1.56828
22	New Blsens-rprhid_control (n1)	newBL-rprhidcontrol-1 (120)	1313	0.718519	1.46174	175.811	1	0	0.1536	53	2.38861
22	New Blsens-rprhid_control (n1)	newBL-rprhidcontrol-1 (127)	958	0.845935	1.49178	46.812	1	0	0.928	55	1.74302
22	New Blsens-rprhid_control (n1)	newBL-rprhidcontrol-1 (141)	519	0.742621	1.1743	20.417	0.82	0.18	0.9864	28	1.43923
22	New Blsens-rprhid_control (n1)	newBL-rprhidcontrol-1 (142)	856	3.10475	1.26627	38.7878	0.67	0.33	0.8328	22	1.09667
22	New Blsens-rprhid_control (n1)	newBL-rprhidcontrol-1 (144)	1091	0.455242	1.42433	84.0616	1	0	0.8624	46	2.26636
22	New Blsens-rprhid_control (n1)	newBL-rprhidcontrol-1 (3)	1458	0.584193	1.18052	45.7357	1	0	0.3068	74	1.8937
22	New Blsens-rprhid_control (n1)	newBL-rprhidcontrol-1 (4)	2162	0.706421	2.05327	13.2723	1	0	0.986	226	1.27388
22	New Blsens-rprhid_control (n1)	newBL-rprhidcontrol-1 (7)	577	1.33282	1.47595	53.5815	1	0	0.8548	23	1.60424
22	New Blsens-rprhid_control (n1)	newBL-rprhidcontrol-1 (8)	1415	0.870032	1.25135	81.1206	1	0	0.7616	44	1.9696
22	New Blsens-rprhid_control (n1)	newBL-rprhidcontrol-1 (86)	1038	1.55222	1.79753	83.8012	1	0	0.0604	51	1.7323
22	New Blsens-rprhid_control (n1)	newBL-rprhidcontrol-1 (9)	3371	0.445192	1.45742	18.9464	1	0	0.8504	269	1.62898
22	New Blsens-rprhid_control (n1)	newBL-rprhidcontrol-1 (92)	696	8.52157	2.22754	156.566	0.97	0.03	1	12	1.26418
22	New Blsens-rprhid_control (n1)	newBLsens-rprhidcontrol-1 (0)	3317	0.513673	1.39376	127.47	1	0	0.6584	113	2.39472
22	New Blsens-rprhid_control (n1)	newBLsens-rprhidcontrol-1 (1)	2040	0.453273	1.63878	8.73406	1	0	0.4056	61	1.28486
22	New Blsens-rprhid_control (n1)	newBLsens-rprhidcontrol-1 (2)	931	0.531022	1.05386	60.6349	1	0	0.5812	29	2.05761
22	New Blsens-rprhid_control (n1)	newBLsens-rprhidcontrol-1 (58)	2853	0.442035	1.16694	42.7047	1	0	0.4656	89	1.98502
22	New Blsens-rprhid_control (n1)	newBLsens-rprhidcontrol-1 (6)	4795	0.445718	1.25941	82.7428	1	0	0	131	2.26867
22	New Blsens-rprhid_control (n1)	newBLsens-rprhidcontrol-1 (61)	111	0.493923	1.7236	25.028	0.72	0.28	0.6964	6	1.70477
22	New Blsens-rprhid_control (n1)	newBLsens-rprhidcontrol-1 (65)	570	0.458606	1.11887	48.9362	1	0	0.2124	22	2.02819
22	New Blsens-rprhid_control (n1)	newBLsens-rprhidcontrol-1 (7)	2983	0.444014	1.13729	73.4703	1	0	0.0112	102	2.21871
22	New Blsens-rprhid_control (n1)	newBLsens-rprhidcontrol-1 (78)	198	0.563194	1.13578	23.4738	0.85	0.15	0.4316	14	1.61993
22	New Blsens-rprhid_control (n1)	newBLsens-rprhidcontrol-1 (8)	3751	0.440705	1.48223	38.466	1	0	0.8364	99	1.94093
22	New Blsens-rprhid_control (n1)	newBLsens-rprhidcontrol-1 (9)	1364	0.567471	1.08524	83.594	1	0	0.9768	33	2.16823
22	New Blsens-rprhid_control (n2)	newBL-rprhidcontrol-2 (0)	4859	0.440064	1.54692	16.154	1	0	0.2436	405	1.56476
22	New Blsens-rprhid_control (n2)	newBL-rprhidcontrol-2 (1)	2680	0.805936	1.13214	20.2655	0.99	0.01	0.0528	122	1.40046
22	New Blsens-rprhid_control (n2)	newBL-rprhidcontrol-2 (2)	7337	0.615727	1.98881	14.8841	1	0	0.4692	339	1.38333
22	New Blsens-rprhid_control (n2)	newBL-rprhidcontrol-2 (4)	626	0.489687	1.31947	57.3092	1	0	0.5604	30	2.06831
22	New Blsens-rprhid_control (n2)	newBL-rprhidcontrol-2 (5)	1381	0.452493	1.37779	41.9495	1	0	0.6876	74	1.96711
22	New Blsens-rprhid_control (n2)	newBL-rprhidcontrol-2 (6)	1944	0.469051	1.21762	10.4488	0.98	0.02	0.9768	76	1.34784
22	New Blsens-rprhid_control (n2)	newBL-rprhidcontrol-2 (7)	1251	0.442507	1.43008	35.6472	1	0	0.9384	56	1.9061
22	New Blsens-rprhid_control (n2)	newBL-rprhidcontrol-2 (8)	1043	0.459203	1.1374	35.7993	1	0	0.7716	42	1.89187
22	New Blsens-rprhid_control (n2)	newBL-rprhidcontrol-2 (9)	537	0.506478	1.46279	70.0099	1	0	0.8956	22	2.1406
22	New Blsens-rprhid_control (n2)	newBLsens-rprhidcontrol-2 (0)	2457	0.463686	1.04578	58.1038	1	0	0	102	2.09798
22	New Blsens-rprhid_control (n2)	newBLsens-rprhidcontrol-2 (1)	1031	0.444694	1.40431	22.8659	1	0	0.4132	31	1.71113
22	New Blsens-rprhid_control (n2)	newBLsens-rprhidcontrol-2 (2)	2080	0.456748	1.27194	38.5612	1	0	0.6756	50	1.92647
22	New Blsens-rprhid_control (n2)	newBLsens-rprhidcontrol-2 (3)	2612	0.465139	1.29659	121.535	1	0	0.0564	104	2.41712
22	New Blsens-rprhid_control (n2)	newBLsens-rprhidcontrol-2 (4)	1275	0.473805	1.15844	29.1471	1	0	0.1264	60	1.789
22	New Blsens-rprhid_control (n2)	newBLsens-rprhidcontrol-2 (5)	3274	0.440891	1.92593	52.6429	1	0	0.2968	181	2.07701
22	New Blsens-rprhid_control (n2)	newBLsens-rprhidcontrol-2 (6)	2482	0.440846	1.41228	34.7481	1	0	0.1024	111	1.89664
22	New Blsens-rprhid_control (n2)	newBLsens-rprhidcontrol-2 (7)	6970	0.483747	1.0283	26.4409	1	0	0	330	1.73766
22	New Blsens-rprhid_control (n2)	newBLsens-rprhidcontrol-2 (8)	2517	0.458339	1.10096	52.9145	1	0	0.014	95	2.06239
22	New Blsens-rprhid_control (n2)	newBLsens-rprhidcontrol-2 (9)	5593	3.42062	1.9409	74.4332	1	0	0.9768	27	1.33766
22	New BLsens-rprhid_control (n3)	newBlsens-rprhidcontrol-4 (0)	7204	0.454398	1.55818	12.2798	1	0	0.0208	341	1.43176
22	New BLsens-rprhid_control (n3)	newBlsens-rprhidcontrol-4 (2)	1724	1.21357	1.48223	66.8564	1	0	0.8948	57	1.74108
22	New BLsens-rprhid_control (n3)	newBlsens-rprhidcontrol-4 (3)	2515	0.446288	1.45266	65.1336	1	0	0.0256	98	2.16419
22	New BLsens-rprhid_control (n3)	newBlsens-rprhidcontrol-4 (4)	7204	0.486068	1.32178	18.9022	1	0	0.13	76	1.58981
22	New BLsens-rprhid_control (n3)	newBlsens-rprhidcontrol-4 (5)	4316	1.77488	1.83367	39.5841	1	0	0.5756	96	1.34835
22	New BLsens-rprhid_control (n3)	newBlsens-rprhidcontrol-4 (6)	6643	3.93923	2.0912	96.0738	1	0	0.8904	59	1.38719
22	New BLsens-rprhid_control (n3)	newBlsens-rprhidcontrol-4 (7)	7204	0.445001	2.69459	2.15372	0.62	0.38	0.858	29	0.684828
22	New BLsens-rprhid_control (n3)	newBlsens-rprhidcontrol-4 (8)	4580	0.447566	1.53369	28.023	1	0	0.1204	227	1.79666
22	New BLsens-rprhid_control (n3)	newBlsens-rprhidcontrol-4 (9)	5326	0.457446	1.33963	13.8697	1	0	0.1888	213	1.48173
22	New Blsens-rprhid_control (n4)	newBL-rprhidcontrol-4 (0)	7214	0.440171	1.38911	4.11485	0.96	0.04	0.7976	48	0.970733
22	New Blsens-rprhid_control (n4)	newBL-rprhidcontrol-4 (1)	2685	0.4449	1.85702	5.86869	1	0	0.0112	131	1.12028
22	New Blsens-rprhid_control (n4)	newBL-rprhidcontrol-4 (2)	685	3.03827	1.78924	73.1967	0.77	0.23	0.91	9	1.38187
22	New Blsens-rprhid_control (n4)	newBL-rprhidcontrol-4 (3)	7214	0.446579	1.43375	30.4293	1	0	0.2804	281	1.83339
22	New Blsens-rprhid_control (n4)	newBL-rprhidcontrol-4 (4)	880	4.36201	2.47724	46.9891	0.96	0.04	0.8516	24	1.03231
22	New Blsens-rprhid_control (n4)	newBL-rprhidcontrol-4 (5)	2562	2.12647	1.98419	27.4109	0.99	0.01	0.8396	91	1.11026
22	New Blsens-rprhid_control (n4)	newBL-rprhidcontrol-4 (8)	2719	0.444106	1.21553	12.9061	1	0	0.0352	102	1.46331
22	New Blsens-rprhid_control (n4)	newBL-rprhidcontrol-4 (9)	6269	0.45101	2.15874	16.7701	1	0	0.0724	286	1.57035
33	New BLsens-rprhid (n1)	newBL-rprhid-2 (1)	5795	0.441183	1.93606	3.01977	1	0	0.0192	205	0.835356
33	New BLsens-rprhid (n1)	newBL-rprhid-2 (2)	7075	0.600282	2.55909	9.37849	1	0	0.8336	245	1.19378
33	New BLsens-rprhid (n1)	newBL-rprhid-2 (4)	6581	0.540639	1.59075	8.07684	0.92	0.08	0.02	52	1.17433
33	New BLsens-rprhid (n1)	newBL-rprhid-2 (5)	7074	0.450668	1.99706	19.9826	1	0	0.1152	548	1.6468
33	New BLsens-rprhid (n1)	newBL-rprhid-2 (7)	5611	0.620379	2.09375	37.8738	1	0	0.2764	333	1.78568
33	New BLsens-rprhid (n1)	newBL-rprhid-2 (8)	5318	0.818775	2.24572	26.7931	1	0	0.3968	421	1.51486
33	New BLsens-rprhid (n1)	newBLsens-rprhid-1 (1)	7209	0.440506	1.91359	0.630063	1	0	0	46	0.155432
33	New BLsens-rprhid (n1)	newBLsens-rprhid-1 (2)	2139	1.08401	1.9345	40.8443	1	0	0.4476	231	1.5761
33	New BLsens-rprhid (n1)	newBLsens-rprhid-1 (5)	1598	0.440078	1.94072	20.62	1	0	0.3224	146	1.67076
33	New BLsens-rprhid (n2)	newBL-rprhid-3 (1)	7195	0.445332	2.29073	0.808916	1	0	0	50	0.259219
33	New BLsens-rprhid (n2)	newBL-rprhid-3 (3)	7247	0.448089	1.56771	1.15368	0.99	0.01	0.8812	50	0.41072
33	New BLsens-rprhid (n2)	newBLsens-rprhid-2 (1)	6918	0.554821	2.44144	7.95718	1	0	0.534	358	1.15661
33	New BLsens-rprhid (n2)	newBLsens-rprhid-2 (3)	5835	0.440304	2.31489	6.49937	1	0	0	513	1.16912
33	New BLsens-rprhid (n2)	newBLsens-rprhid-2 (5)	7202	0.440316	1.87168	0.707941	0.99	0.01	0.9452	30	0.206232
33	New BLsens-rprhid (n2)	newBLsens-rprhid-2 (6)	6982	0.453265	2.79373	0.825902	0.98	0.02	0.2212	46	0.260577
33	New BLsens-rprhid (n2)	newBLsens-rprhid-2 (8)	6666	0.832083	1.2533	13.8909	0.98	0.02	0.9468	64	1.22256
33	New BLsens-rprhid (n3)	newBL-rprhid-4 (2)	4686	0.830112	2.4175	4.40918	1	0	0.7964	192	0.725222
33	New BLsens-rprhid (n3)	newBL-rprhid-4 (3)	2260	0.64784	2.49163	9.28312	1	0	0.3292	151	1.15623
33	New BLsens-rprhid (n3)	newBL-rprhid-4 (4)	7204	0.452519	2.59787	0.741864	0.99	0.01	0.0404	39	0.214687
33	New BLsens-rprhid (n3)	newBL-rprhid-4 (6)	2774	0.448043	1.091	2.70519	0.73	0.27	0.474	33	0.780878
33	New BLsens-rprhid (n3)	newBLsens-rprhid-3 (4)	4582	0.493846	2.82129	4.21557	1	0	0	254	0.931265
33	New BLsens-rprhid (n3)	newBLsens-rprhid-3 (9)	7203	0.488611	2.63964	4.32233	1	0	0.736	164	0.946755
33	New BLsens-rprhid (n4)	newBLsens-rprhid-4 (360)	1060	0.440037	2.48841	1.4087	0.94	0.06	0.7596	83	0.50533
