# Supplementary material for: Optimal searching behaviour generated intrinsically by the central pattern generator for locomotion
Source: eLife journal article supplement (doi:10.7554/elife.50316), 2019-11-01
Supplement: supp [file elife-50316-supp-v1.zip › elife_poa_e50316_Supplementary_file_4.xlsx]

## Sheet: AIC Analysis
Supplementary File 4 Other models
ToC	Track Trial and name	No of points	Xmin	Exponent	Xmax	Best fit	TP	P	E	TE	LN	G	TP llh	P llh	E llh	TE llh	LN llh	G llh
22	BL-+_n1_22deg (1)	418	0.4871	1.1655	25.2291	TP	0.893	0.034	0.0389	0.0119	0.0168	0.0054	-52.7194	-57.3395	-57.2034	-57.0387	-58.0435	-59.1771
22	BL-+_n1_22deg (13)	752	0.5832	1.4431	28.1564	TP	0.9145	0.0844	0.0005	0.0002	0.0005	0	-73.8604	-77.443	-82.5896	-82.5594	-82.5491	-87.4044
22	BL-+_n1_22deg (14)	493	0.4517	1.4905	17.3559	TP	0.8417	0.1578	0.0001	0	0.0002	0	-50.4962	-53.4094	-60.4311	-60.3628	-59.8856	-64.8578
22	BL-+_n1_22deg (17)	1367	0.4505	1.185	13.2687	TP	0.9975	0	0.0014	0.0011	0	0	-130.641	-145.165	-138.285	-137.47	-144.037	-147.61
22	BL-+_n1_22deg (19)	562	0.5792	1.4507	17.2986	TP	0.9319	0.0657	0.0015	0.0005	0.0003	0	-61.5611	-65.4266	-69.1837	-69.0514	-70.9091	-74.981
22	BL-+_n1_22deg (2)	7359	0.4693	2.0468	9.9194	TP	0.618	0.382	0	0	0	0	-43.0452	-44.6567	-57.7581	-57.745	-62.7709	-73.9219
22	BL-+_n1_22deg (4)	1327	0.4433	1.1198	28.8734	TP	0.9996	0	0	0	0.0003	0	-126.01	-137.532	-137.282	-136.894	-135.105	-140.336
22	BL-+_n1_22deg (6)	1579	0.4483	1.0084	42.9302	TP	0.9999	0	0	0	0.0001	0	-163.994	-180.521	-176.188	-175.617	-174.623	-177.313
22	BL-+_n1_22deg (7)	5141	0.4442	1.25	28.9067	TP	1	0	0	0	0	0	-513.897	-550.386	-547.821	-547.519	-553.823	-569.237
22	BL-+_n1_22deg (8)	5852	0.4676	1.4686	36.2298	TP	1	0	0	0	0	0	-319.593	-332.243	-357.866	-357.858	-357.921	-375.932
22	BL-+_n2_22deg (0)	4266	0.4587	1.173	112.107	TP	1	0	0	0	0	0	-324.023	-341.583	-359.105	-359.088	-340.915	-350.995
22	BL-+_n2_22deg (1)	1885	0.4422	1.7317	5.3127	TP	0.9956	0.0016	0.0018	0.001	0	0	-67.3693	-74.8752	-74.7655	-74.2584	-87.6775	-94.9973
22	BL-+_n2_22deg (3)	2622	0.448	1.0314	43.8485	TP	1	0	0	0	0	0	-242.347	-265.584	-258.269	-257.695	-257.784	-260.555
22	BL-+_n2_22deg (4)	8185	0.5245	1.3479	49.6888	TP	1	0	0	0	0	0	-775.699	-811.124	-857.863	-857.81	-846.301	-878.451
22	BL-+_n2_22deg (5)	8094	0.4406	1.6211	20.3164	TP	1	0	0	0	0	0	-849.272	-883.469	-954.503	-954.466	-977.197	-1059.86
22	BL-+_n2_22deg (8)	2844	0.5542	1.0835	27.2121	TP	0.9999	0	0.0001	0.0001	0	0	-297.141	-326.286	-307.89	-306.911	-317.57	-318.788
22	BL-+_n2_22deg (9)	8205	0.5661	1.9061	54.1276	TP	0.9875	0.0125	0	0	0	0	-575.367	-580.749	-680.516	-680.516	-691.563	-772.409
22	BL-+_n3_22deg (1)	6660	8.3547	2.2718	25.8224	TP	0.682	0.0004	0.0305	0.2871	0	0	-176.506	-185.03	-180.71	-177.372	-192.841	-195.033
22	BL-+_n3_22deg (112)	3117	0.4498	1.742	6.0762	TP	0.9999	0.0001	0	0	0	0	-106.04	-116.086	-119.52	-118.966	-136.561	-149.744
22	BL-+_n3_22deg (135)	252	0.6469	1.023	18.4405	TP	0.3243	0.1459	0.238	0.0453	0.1709	0.0756	-24.2678	-27.2097	-26.7201	-26.237	-27.051	-27.8668
22	BL-+_n3_22deg (136)	2412	0.4434	1.3883	66.2971	TP	0.9998	0.0002	0	0	0	0	-260.804	-270.234	-298.768	-298.767	-284.613	-300.751
22	BL-+_n3_22deg (141)	424	3.5543	1.9605	94.6911	P	0.0356	0.9374	0.0078	0.0002	0.0168	0.0022	-21.1307	-21.3598	-26.1532	-26.1332	-25.3808	-27.4209
22	BL-+_n3_22deg (143)	1400	0.5317	1.4435	115.852	TP	0.8928	0.106	0	0	0.0012	0	-135.362	-138.618	-155.619	-155.619	-143.073	-155.804
22	BL-+_n3_22deg (163)	499	0.5637	1.0013	26.4713	TP	0.9238	0.0082	0.0344	0.0154	0.0102	0.0079	-53.9536	-60.074	-58.6398	-58.0462	-59.8594	-60.1114
22	BL-+_n3_22deg (2)	6660	0.4428	1.7942	23.0473	TP	0.6841	0.3159	0	0	0	0	-74.6355	-76.5234	-94.599	-94.5985	-94.3935	-106.328
22	BL-+_n3_22deg (4)	2582	0.466	1.9464	7.8715	TP	0.8406	0.1593	0	0	0	0	-49.5742	-52.3527	-60.5144	-60.4591	-68.6945	-77.8071
22	BL-+_n3_22deg (5)	2714	0.4424	1.3628	39.55	TP	1	0	0	0	0	0	-303.047	-317.776	-358.38	-358.302	-342.16	-361.702
22	BL-+_n3_22deg (6)	6660	0.4445	1.2837	12.9219	TP	1	0	0	0	0	0	-691.654	-758.737	-734.261	-731.635	-768.288	-793.435
22	BL-+_n3_22deg (7)	6636	0.581	2.0533	3.7217	TP	0.4804	0.0549	0.3141	0.1504	0.0001	0	-22.3866	-25.7316	-23.9877	-23.5481	-31.6781	-34.0905
22	BL-+_n3_22deg (8)	1638	0.5497	1.3746	22.4604	TP	0.9464	0.0511	0.0013	0.0004	0.0007	0	-66.3855	-70.5261	-74.1845	-74.0885	-74.8101	-78.5425
22	shi-+_n1_22deg (0)	805	0.4758	1.3889	53.23	TP	0.7391	0.2587	0	0	0.0021	0	-58.8521	-61.2005	-70.5164	-70.5115	-66.0316	-70.3355
22	shi-+_n1_22deg (1)	911	0.4518	1.2722	24.5174	TP	0.9221	0.0756	0.0002	0.0001	0.0021	0.0001	-52.427	-56.2431	-62.3465	-62.141	-59.8345	-63.463
22	shi-+_n1_22deg (19)	789	0.5065	1.45	16.0235	TP	0.8891	0.1098	0.0006	0.0002	0.0004	0	-51.0749	-54.4158	-59.7093	-59.5653	-60.0526	-64.3873
22	shi-+_n1_22deg (2)	911	0.526	1.458	39.3555	TP	0.8149	0.1851	0	0	0	0	-69.1417	-71.8456	-83.5441	-83.5302	-80.0875	-85.1874
22	shi-+_n1_22deg (22)	1364	1.5629	1.3523	77.7707	TP	0.8447	0.1369	0.0068	0.0019	0.0093	0.0004	-78.0697	-81.2036	-84.2069	-84.1562	-83.8939	-86.9565
22	shi-+_n1_22deg (3)	2579	0.7802	1.865	19.1523	TP	0.9232	0.0768	0	0	0	0	-125.48	-129.047	-143.656	-143.632	-152.027	-165.189
22	shi-+_n1_22deg (30)	1120	0.4417	1.2678	77.1225	TP	0.9556	0.044	0	0	0.0004	0	-90.8425	-95.1335	-104.959	-104.953	-99.9684	-102.87
22	shi-+_n1_22deg (4)	4137	0.4424	1.5997	21.0818	TP	1	0	0	0	0	0	-400.702	-417.134	-452.333	-452.311	-458.929	-498.462
22	shi-+_n1_22deg (5)	7341	0.4416	1.4024	11.5738	TP	1	0	0	0	0	0	-257.942	-280.164	-280.134	-279.362	-295.01	-309.338
22	shi-+_n1_22deg (6)	7342	0.7797	2.2982	16.998	TP	0.8632	0.1368	0	0	0	0	-205.364	-208.239	-242.165	-242.164	-273.961	-309.05
22	shi-+_n1_22deg (7)	5539	1.4287	1.581	15.2688	TP	0.994	0	0.0025	0.0035	0	0	-212.687	-226.14	-219.732	-218.349	-235.797	-242.501
22	shi-+_n1_22deg (8)	7326	0.4406	1.3123	16.5727	TP	1	0	0	0	0	0	-606.522	-655.874	-641.853	-640.929	-666.692	-687.888
22	shi-+_n2_22deg (0)	564	0.4481	1.4176	22.2079	TP	0.7046	0.2812	0.0039	0.001	0.009	0.0003	-39.8717	-42.1629	-46.437	-46.4037	-45.6067	-48.8655
22	shi-+_n2_22deg (1)	7300	0.4442	2.786	1.7882	TP	0.5282	0.2259	0.1656	0.0802	0	0	9.7263	7.6839	7.3734	7.842	-2.3911	-5.4382
22	shi-+_n2_22deg (11)	209	0.5445	1.0989	7.1729	TP	0.4944	0.2943	0.1246	0.0485	0.0194	0.0187	-15.7083	-18.3699	-19.2291	-18.0292	-21.089	-21.126
22	shi-+_n2_22deg (12)	5982	0.4467	1.6431	27.0412	TP	1	0	0	0	0	0	-413.788	-426.794	-495.48	-495.474	-490.596	-537.344
22	shi-+_n2_22deg (16)	349	0.458	1.314	15.2541	P	0.337	0.5943	0.0237	0.0036	0.0311	0.0104	-18.621	-20.1967	-23.4202	-23.1599	-23.1473	-24.2458
22	shi-+_n2_22deg (18)	1214	0.5533	1.3958	20.8565	TP	0.9843	0.0111	0.0033	0.0011	0.0001	0	-90.4493	-96.0843	-97.2831	-97.2017	-100.706	-104.342
22	shi-+_n2_22deg (2)	6334	0.5021	1.3299	6.6523	TP	0.5961	0.0592	0.237	0.0971	0.0059	0.0047	-26.8243	-30.531	-29.1439	-28.6391	-32.8385	-33.0628
22	shi-+_n2_22deg (27)	4084	0.4681	1.3947	27.2301	TP	1	0	0	0	0	0	-363.333	-383.011	-395.167	-395.094	-401.114	-417.681
22	shi-+_n2_22deg (30)	268	0.4884	1.2671	8.2392	TP	0.3833	0.0762	0.3537	0.1045	0.0601	0.0222	-24.5656	-27.72	-26.1844	-25.8656	-27.9562	-28.9532
22	shi-+_n2_22deg (31)	2179	0.6552	1.6903	20.3593	TP	0.9708	0.0289	0.0002	0.0001	0	0	-125.871	-130.474	-135.266	-135.253	-142.988	-151.836
22	shi-+_n2_22deg (4)	2096	0.4541	1.1806	20.2564	TP	0.9999	0	0	0	0	0	-170.097	-185.944	-181.4	-180.887	-186.629	-189.922
22	shi-+_n2_22deg (9)	7300	0.595	1.0332	9.9699	TP	0.8685	0	0.0482	0.0827	0.0003	0.0003	-74.2626	-85.632	-78.3307	-76.614	-83.3954	-83.5455
22	shi-+_n3_22deg (0)	7200	1.3609	2.0167	20.9268	TP	0.8319	0.065	0.0764	0.0267	0	0	-149.515	-153.143	-152.982	-152.956	-166.434	-174.981
22	shi-+_n3_22deg (1)	1027	0.5799	1.1354	45.7308	TP	0.8983	0.076	0.0044	0.0012	0.0157	0.0044	-51.9262	-55.8534	-58.7071	-58.5229	-57.4272	-58.7136
22	shi-+_n3_22deg (12)	469	0.5088	1.5235	16.7614	TP	0.6422	0.3498	0.0034	0.0009	0.0037	0.0001	-35.4685	-37.4487	-42.0948	-42.0374	-42.004	-45.6677
22	shi-+_n3_22deg (124)	1003	0.4668	1.6238	16.757	TP	0.9056	0.0944	0	0	0	0	-73.6052	-77.0027	-85.0902	-85.0698	-87.1809	-94.8728
22	shi-+_n3_22deg (16)	5348	0.4418	1.4073	21.1495	TP	1	0	0	0	0	0	-392.012	-415.61	-441.912	-441.655	-442.649	-469.392
22	shi-+_n3_22deg (17)	303	0.4542	1.0785	11.9208	TP	0.5641	0.1006	0.1972	0.0566	0.0451	0.0365	-25.4286	-28.886	-28.2132	-27.7281	-29.6881	-29.9009
22	shi-+_n3_22deg (2)	3030	0.456	1.3622	18.0598	TP	1	0	0	0	0	0	-245.578	-263.08	-274.637	-274.215	-280.61	-292.767
22	shi-+_n3_22deg (3)	7166	0.4575	1.2974	7.6917	TP	0.999	0	0.0003	0.0007	0	0	-150.033	-169.47	-159.069	-157.335	-173.932	-177.186
22	shi-+_n3_22deg (8)	7200	0.4663	1.8999	10.2417	TP	0.9996	0.0004	0	0	0	0	-198.31	-207.165	-237.342	-237.276	-261.079	-293.541
22	shi-+_n3_22deg (9)	7200	0.448	1.3925	28.0395	TP	1	0	0	0	0	0	-607.519	-640.072	-658.889	-658.804	-664.291	-695.54
33	1_DROS_DEC2014 (1)	1232	0.5797	1.0195	143.132	TP	0.9345	0.0034	0.0031	0.0009	0.0368	0.0213	-92.7819	-99.725	-99.7924	-99.7337	-97.3317	-97.8766
33	1_DROS_DEC2014 (3)	7278	0.4472	1.4484	13.6584	TP	1	0	0	0	0	0	-714.91	-766.493	-783.725	-782.661	-815.58	-862.541
33	1_DROS_DEC2014 (4)	3157	11.358	1.2547	34.9745	TP	0.5076	0	0.0015	0.4907	0.0001	0.0001	-169.376	-183.753	-176.297	-169.41	-178.859	-179.177
33	1_DROS_DEC2014 (5)	2428	0.4579	1.1215	26.467	TP	1	0	0	0	0	0	-363.353	-397.39	-383.425	-382.548	-389.711	-396.17
33	1_DROS_DEC2014 (542)	468	0.4496	1.0985	8.6429	TP	0.8003	0.01	0.1102	0.066	0.0095	0.004	-37.123	-42.8587	-40.4562	-39.6186	-42.9119	-43.7664
33	1_DROS_DEC2014 (549)	492	0.4883	1.2891	39.2057	TP	0.811	0.1664	0.0024	0.0006	0.0185	0.0011	-51.2112	-54.1674	-58.4063	-58.3743	-56.3669	-59.2184
33	1_DROS_DEC2014 (551)	485	0.6285	1.2995	14.1718	TP	0.662	0.0067	0.2319	0.0915	0.0068	0.0011	-64.5306	-70.3361	-66.7936	-66.5094	-70.3257	-72.1079
33	1_DROS_DEC2014 (563)	2006	0.4412	1.3473	21.4371	TP	1	0	0	0	0	0	-247.976	-264.617	-264.666	-264.532	-270.664	-281.462
33	1_DROS_DEC2014 (584)	1009	0.455	1.2851	26.6955	TP	0.9996	0.0003	0.0001	0	0	0	-134.991	-144.224	-145.481	-145.393	-146.402	-151.94
33	1_DROS_DEC2014 (6)	831	2.1699	2.2094	12.0925	TP	0.4141	0.1634	0.2999	0.1217	0.0008	0.0001	-48.5595	-50.7494	-50.1423	-49.7841	-56.0731	-58.2936
33	1_DROS_DEC2014 (9)	2698	0.4774	1.1701	10.5105	TP	1	0	0	0	0	0	-298.749	-336.661	-312.283	-309.317	-329.663	-336.239
33	1A_DROS_BL-+_n2 (1)	6019	0.472	1.0755	26.0759	TP	1	0	0	0	0	0	-761.858	-839.551	-802.357	-799.583	-819.915	-827.619
33	1A_DROS_BL-+_n2 (2)	4279	0.4609	1.0991	88.0285	TP	1	0	0	0	0	0	-500.632	-535.473	-536.61	-536.485	-527.303	-532.104
33	1A_DROS_BL-+_n2 (4)	5743	0.4502	1.3155	21.2993	TP	1	0	0	0	0	0	-577.004	-618.249	-620.956	-620.424	-635.326	-657.144
33	1A_DROS_BL-+_n2 (5)	788	0.5813	1.0406	61.5038	TP	0.9954	0	0.0024	0.0009	0.0005	0.0008	-133.364	-144.694	-140.56	-140.354	-142.154	-141.696
33	1A_DROS_BL-+_n2 (6)	2708	2.431	1.4285	12.9179	TP	0.7155	0	0.0097	0.2748	0	0	-162.978	-178.535	-168.36	-163.935	-177.547	-179.893
33	1A_DROS_BL-+_n2 (8)	2265	8.0064	2.2721	95.5904	TP	0.6373	0.3598	0.0022	0.0007	0	0	-173.214	-174.913	-179.992	-179.962	-190.495	-198.343
33	1A_DROS_BL-+_n2 (9)	3078	0.6289	1.0864	67.7497	TP	1	0	0	0	0	0	-458.958	-493.363	-482.293	-481.912	-482.645	-487.036
33	1B_DROS_BL-+_n3 (0)	686	2.7208	1.4655	26.0584	TP	0.4878	0.1366	0.2597	0.0973	0.0136	0.005	-46.0094	-48.7771	-48.1346	-47.6213	-51.0874	-52.0755
33	1B_DROS_BL-+_n3 (14)	1063	1.2639	1.3762	19.6306	TP	0.827	0.0101	0.1078	0.0532	0.0016	0.0002	-79.5488	-85.1569	-82.7924	-82.2924	-86.9813	-89.327
33	1B_DROS_BL-+_n3 (18)	7235	0.581	1.0312	21.7374	TP	1	0	0	0	0	0	-725.897	-808.957	-754.009	-748.843	-779.654	-783.67
33	1B_DROS_BL-+_n3 (2)	6034	0.4883	1.1241	6.878	TP	0.9992	0	0	0.0008	0	0	-304.855	-356.653	-319.091	-311.941	-340.966	-347.21
33	1B_DROS_BL-+_n3 (22)	2508	0.5385	1.13	36.5329	TP	1	0	0	0	0	0	-288.794	-312.528	-304.688	-304.234	-307.203	-312.637
33	1B_DROS_BL-+_n3 (23)	397	0.5773	1.542	126.332	P	0.2494	0.7472	0	0	0.0034	0	-33.309	-33.8663	-48.5384	-48.5381	-39.2621	-44.251
33	1B_DROS_BL-+_n3 (29)	4005	0.4439	1.1664	32.0468	TP	1	0	0	0	0	0	-426.46	-460.885	-457.397	-456.868	-460.672	-469.196
33	1B_DROS_BL-+_n3 (53)	348	0.4404	1.1023	15.4862	TP	0.8377	0.0229	0.0729	0.0273	0.0316	0.0077	-42.3276	-47.3253	-46.1662	-45.7518	-47.0036	-48.4148
33	1B_DROS_BL-+_n3 (58)	2095	0.4446	1.3451	14.3761	TP	1	0	0	0	0	0	-159.838	-173.106	-175.152	-174.718	-179.988	-189.216
33	1B_DROS_BL-+_n3 (61)	1670	0.5153	1.2254	12.1483	TP	0.9989	0	0.0005	0.0006	0	0	-167.471	-185.691	-176.117	-174.925	-184.867	-189.832
33	1B_DROS_BL-+_n3 (66)	1255	0.4454	1.3419	10.8037	TP	0.9974	0.0007	0.0013	0.0007	0	0	-85.4873	-93.8981	-93.287	-92.8204	-98.0824	-102.507
33	1B_DROS_BL-+_n3 (67)	860	0.9255	1.2441	21.4283	TP	0.9787	0.0008	0.0127	0.0074	0.0003	0	-101.448	-109.665	-106.956	-106.334	-110.552	-113.684
33	1B_DROS_BL-+_n3 (68)	388	0.461	1.8415	12.0998	P	0.4912	0.5078	0.0007	0.0002	0.0002	0	-29.9557	-31.1942	-37.8482	-37.8368	-39.0361	-44.8848
33	1B_DROS_BL-+_n3 (7)	8149	0.6157	1.7374	2.8206	TP	0.8619	0	0.0016	0.1364	0	0	-61.6873	-80.6363	-68.9995	-63.5306	-87.2434	-91.8182
33	1B_DROS_BL-+_n3 (9)	8149	0.4429	1.8837	2.4027	TP	0.9744	0	0.0012	0.0244	0	0	-42.4209	-61.6567	-50.143	-46.1072	-77.8963	-86.17
33	2_DROS_DEC2014 (10)	6978	0.545	2.6432	3.8901	TP	0.7886	0.1602	0.0371	0.0141	0	0	-21.7965	-24.4633	-25.927	-25.8222	-47.3639	-55.8551
33	2_DROS_DEC2014 (12)	6386	0.6304	1.848	13.781	TP	0.9982	0.0018	0	0	0	0	-195.437	-202.805	-213.024	-212.982	-235.42	-251.235
33	2_DROS_DEC2014 (15)	6978	0.4518	2.2897	11.967	TP	0.9811	0.0189	0	0	0	0	-235.374	-240.34	-278.524	-278.524	-355.486	-409.805
33	2_DROS_DEC2014 (16)	6978	0.4501	1.8528	7.9283	TP	0.9998	0.0002	0	0	0	0	-154.006	-163.622	-182.375	-182.165	-210.005	-228.668
33	2_DROS_DEC2014 (18)	6344	0.7771	2.5803	19.2986	P	0.3817	0.6183	0	0	0	0	-87.3281	-87.9081	-111.94	-111.94	-131.257	-154.317
33	2_DROS_DEC2014 (355)	320	0.4998	1.9327	4.1821	P	0.3893	0.4149	0.1494	0.0411	0.0046	0.0007	-10.937	-12.3677	-13.3895	-13.1845	-16.879	-18.8064
33	2A_DROS_BLsens-shi_n2 (1)	8433	0.558	1.3546	3.6072	TP	0.4712	0.0471	0.2735	0.1896	0.0113	0.0075	-15.363	-19.1236	-17.3642	-16.2735	-20.5523	-20.9651
33	2A_DROS_BLsens-shi_n2 (2)	8433	0.5134	1.8359	11.6078	TP	0.6468	0.2809	0.0549	0.0171	0.0003	0	-45.8717	-47.882	-49.5153	-49.5071	-54.5877	-59.5127
33	2A_DROS_BLsens-shi_n2 (6)	8433	0.4756	1.8917	12.0354	TP	0.9012	0.0987	0.0001	0	0	0	-85.7676	-89.0588	-96.2136	-96.2072	-108.49	-117.829
33	2A_DROS_BLsens-shi_n2 (7)	8433	0.455	1.7479	5.9804	TP	0.7472	0.1266	0.0932	0.0326	0.0005	0	-31.1134	-34.0954	-34.4015	-34.2462	-39.6682	-43.1628
33	2A_DROS_BLsens-shi_n2 (9)	8433	0.5858	1.613	11.6473	TP	0.9735	0.0127	0.0101	0.0038	0	0	-86.6097	-92.0658	-92.2957	-92.1628	-99.525	-105.246
33	3_DROS_DEC2014 (0)	7224	0.4478	1.7492	5.9815	TP	1	0	0	0	0	0	-368.813	-404.098	-397.491	-395.989	-468.14	-498.007
33	3_DROS_DEC2014 (1)	7224	0.5317	2.1764	13.4562	TP	0.9999	0.0001	0	0	0	0	-505.282	-516.049	-597.664	-597.662	-690.836	-787.925
33	3_DROS_DEC2014 (25)	246	0.5508	1.0972	6.7921	TP	0.4714	0.005	0.2896	0.205	0.0154	0.0136	-33.599	-39.4907	-35.4373	-34.4318	-38.3696	-38.4957
33	3_DROS_DEC2014 (326)	660	0.4481	2.2526	3.8434	TP	0.9231	0.0526	0.0172	0.0071	0	0	-28.568	-32.5111	-33.626	-33.4384	-51.2515	-59.4076
33	3_DROS_DEC2014 (4)	7224	0.4617	2.7338	1.6739	TP	0.3712	0.2035	0.2888	0.1362	0.0002	0	7.6278	5.7549	6.1053	6.6253	-1.0023	-2.5794
33	3_DROS_DEC2014 (5)	491	0.4536	1.5477	4.9455	TP	0.8919	0.001	0.0613	0.0457	0	0	-55.2821	-63.2226	-59.0722	-58.2529	-67.1685	-71.4698
33	4_DROS_DEC2014 (0)	5245	0.4518	1.5846	11.1157	TP	1	0	0	0	0	0	-448.702	-478.75	-480.633	-480.227	-515.051	-549.845
33	4_DROS_DEC2014 (5)	7410	0.4408	1.4197	15.0128	TP	1	0	0	0	0	0	-693.119	-742.65	-746.443	-745.708	-775.202	-814.899
33	4_DROS_DEC2014 (519)	433	0.4495	1.1161	17.9114	TP	0.9774	0.0015	0.0129	0.006	0.0018	0.0004	-70.6748	-78.3768	-76.2264	-75.7614	-78.2205	-79.6489
33	4_DROS_DEC2014 (534)	422	0.5698	1.513	36.0616	TP	0.6805	0.3181	0.0001	0	0.0012	0	-56.1334	-58.1655	-65.88	-65.8739	-63.7129	-68.8263
33	4_DROS_DEC2014 (535)	532	0.5708	1.0955	20.3481	TP	0.7463	0.011	0.1481	0.0547	0.0279	0.012	-52.6564	-58.2281	-55.6246	-55.2695	-57.2939	-58.1339
33	4_DROS_DEC2014 (7)	5026	0.4416	1.2548	9.8011	TP	1	0	0	0	0	0	-602.236	-673.219	-635.436	-630.858	-673.469	-693.784
33	4_DROS_DEC2014 (8)	3753	0.4417	1.1761	24.9039	TP	1	0	0	0	0	0	-579.299	-629.582	-615.043	-614.032	-624.059	-638.568
33	5_DROS_BL-shi_n3 (10)	7798	5.186	1.8546	24.2347	TP	0.5703	0	0.002	0.4276	0	0	-502.25	-528.364	-508.919	-502.538	-535.826	-542.176
33	5_DROS_BL-shi_n3 (15)	7735	1.0387	2.1293	7.5475	TP	1	0	0	0	0	0	-731.781	-774.37	-755.673	-751.957	-881.753	-924.748
33	5_DROS_BL-shi_n3 (2)	6602	2.4925	1.6881	10.3354	TP	0.7265	0	0	0.2735	0	0	-397.53	-434.765	-410.377	-398.507	-436.914	-442.925
33	5_DROS_BL-shi_n3 (203)	1967	4.4643	2.0012	9.6874	TP	0.5219	0.0001	0.0063	0.4715	0.0001	0.0001	-74.5881	-83.9278	-80.1476	-74.6895	-83.9603	-84.6571
33	5_DROS_BL-shi_n3 (209)	7767	0.4404	2.1937	2.8485	TP	1	0	0	0	0	0	-59.7235	-77.615	-72.2298	-70.1951	-128.875	-146.263
33	5_DROS_BL-shi_n3 (24)	7804	0.9088	2.8203	5.6915	TP	0.9988	0.001	0.0002	0.0001	0	0	-179.094	-187.04	-188.907	-188.546	-260.853	-286.454
33	5_DROS_BL-shi_n3 (467)	3391	0.4429	1.3595	14.7587	TP	1	0	0	0	0	0	-416.111	-449.357	-442.143	-441.485	-464.463	-479.343
33	5_DROS_BL-shi_n3 (474)	414	0.4737	1.6288	3.5538	TP	0.5813	0.0737	0.2252	0.1166	0.0025	0.0006	-16.5473	-19.927	-18.8096	-18.1533	-23.295	-24.6621
33	5_DROS_BL-shi_n3 (482)	244	0.4409	1.0063	8.0281	TP	0.7861	0.0283	0.0982	0.0663	0.0119	0.0092	-27.0869	-31.9478	-30.7052	-29.5599	-32.8166	-33.0763
33	5_DROS_BL-shi_n3 (496)	504	2.2776	1.7922	14.5734	TP	0.461	0.0912	0.3008	0.1431	0.0031	0.0008	-49.548	-52.4825	-51.2895	-50.7179	-55.8559	-57.2778
33	5_DROS_BL-shi_n3 (549)	216	0.4951	1.1933	9.4493	TP	0.2913	0.2723	0.265	0.0452	0.0776	0.0486	-17.0022	-19.2127	-19.2398	-18.865	-20.468	-20.935
33	5_DROS_BL-shi_n3 (557)	328	0.4417	1.0476	19.4857	TP	0.8659	0.0474	0.0402	0.0143	0.0194	0.0127	-37.593	-42.0363	-42.2002	-41.6971	-42.9285	-43.3533
33	5_DROS_BL-shi_n3 (81)	7794	0.4447	1.783	8.0279	TP	1	0	0	0	0	0	-440.009	-469.644	-481.171	-480.705	-546.775	-592.314
33	MB247-+_n1 (4)	7310	0.4404	2.4885	3.5296	TP	0.6688	0.2997	0.0233	0.0082	0	0	-9.1267	-11.047	-13.6034	-13.5236	-27.1172	-33.632
33	MB247-+_n1 (5)	7345	0.441	2.2245	49.1887	TP	0.5107	0.4893	0	0	0	0	-272.694	-273.754	-431.299	-431.299	-418.594	-541.067
33	MB247-+_n1 (6)	5847	2.1235	1.7778	37.5079	TP	1	0	0	0	0	0	-417.924	-429.228	-435.367	-435.15	-457.541	-477.25
33	MB247-+_n1 (8)	7345	0.4464	1.6775	3.2928	TP	1	0	0	0	0	0	-182.658	-223.521	-199.952	-193.393	-249.99	-267.857
33	MB247-+_n1 (9)	7345	0.4419	1.5789	11.1872	TP	1	0	0	0	0	0	-336.236	-358.825	-371.305	-370.92	-394.491	-423.803
33	MB247-+_n2 (12)	553	1.9547	1.6298	30.017	TP	0.7572	0.1528	0.0664	0.0223	0.0013	0.0001	-71.4673	-74.328	-75.161	-74.9939	-79.0635	-81.976
33	MB247-+_n2 (13)	1346	0.7057	1.5214	10.2097	TP	0.9589	0.0007	0.0257	0.0147	0	0	-103.51	-111.901	-108.231	-107.685	-116.784	-121.894
33	MB247-+_n2 (14)	224	2.9974	2.8663	25.765	P	0.0907	0.8704	0.033	0.003	0.0026	0.0003	-16.9031	-17.0412	-20.3149	-20.3006	-22.8418	-24.9027
33	MB247-+_n2 (3)	5202	0.44	1.538	21.9272	TP	1	0	0	0	0	0	-394.075	-411.95	-446.906	-446.861	-450.939	-484.612
33	MB247-+_n2 (4)	6066	0.5092	1.8522	11.2709	TP	0.9998	0.0002	0	0	0	0	-219.501	-229.138	-258.186	-258.091	-279.751	-310.843
33	MB247-+_n2 (450)	595	0.442	1.3637	27.8262	TP	0.9884	0.009	0.0017	0.0006	0.0004	0	-102.174	-108.014	-109.68	-109.662	-111.048	-115.559
33	MB247-+_n2 (5)	6135	2.251	1.3085	7.7812	TP	0.7484	0	0	0.2516	0	0	-269.03	-310.555	-288.614	-270.12	-302.956	-305.047
33	MB247-+_n2 (6)	7205	0.6838	1.5237	10.4728	TP	1	0	0	0	0	0	-458.721	-494.97	-481.402	-479.262	-519.863	-542.334
33	MB247-+_n2 (631)	295	0.477	1.7352	15.6137	TP	0.6042	0.3958	0	0	0	0	-41.6309	-43.2841	-53.4347	-53.4142	-53.7318	-59.8714
33	MB247-+_n3 (0)	5014	0.456	1.6031	2.942	TP	0.3691	0.0021	0.312	0.3147	0.0018	0.0003	-22.4522	-28.8115	-23.7869	-22.6116	-28.9467	-30.6687
33	MB247-+_n3 (1)	5038	3.4391	1.9805	12.0997	TP	0.5987	0.0004	0.0514	0.3495	0	0	-112.483	-120.985	-116.049	-113.021	-124.933	-126.769
33	MB247-+_n3 (2)	3530	0.4427	1.1831	39.1936	TP	1	0	0	0	0	0	-550.42	-590.509	-589.683	-589.361	-585.441	-601.655
33	MB247-+_n3 (3)	4938	1.7155	2.3014	51.6688	P	0.4965	0.5035	0	0	0	0	-193.839	-194.888	-218.362	-218.362	-230.147	-254.43
33	MB247-+_n3 (4)	2363	0.4721	1.2448	36.3899	TP	1	0	0	0	0	0	-303.445	-323.312	-320.676	-320.582	-323.581	-331.29
33	MB247-+_n3 (5)	817	0.5486	1.0115	55.2502	TP	1	0	0	0	0	0	-176.762	-193.154	-189.269	-188.74	-188.787	-190.098
33	MB247-+_n3 (6)	5029	0.4417	1.5733	7.5675	TP	1	0	0	0	0	0	-246.59	-269.524	-262.578	-261.702	-291.112	-307.922
33	MB247-+_n3 (8)	2733	0.4838	1.386	13.6899	TP	1	0	0	0	0	0	-314.16	-339.25	-339.581	-338.786	-352.928	-370.743
33	MB247-+_n3 (9)	926	4.5987	2.6852	93.7906	P	0.2614	0.7386	0	0	0	0	-81.2951	-81.478	-92.4537	-92.4537	-97.5957	-106.906
33	MB247-shi-n1 (0)	1651	0.4429	1.1223	66.0845	TP	0.9998	0	0	0	0.0002	0	-187.823	-201.176	-202.778	-202.705	-197.703	-202.214
33	MB247-shi-n1 (1)	2078	0.6837	2.1198	11.8593	TP	0.7147	0.2853	0.0001	0	0	0	-70.3621	-72.3821	-80.9794	-80.9672	-91.1374	-102.046
33	MB247-shi-n1 (2)	7203	0.5148	1.6325	4.4742	TP	0.3841	0.2626	0.2609	0.0763	0.0111	0.0049	-13.1221	-15.0931	-15.0996	-14.7379	-18.2569	-19.0782
33	MB247-shi-n1 (4)	675	0.532	1.1172	65.8691	TP	0.9872	0.0028	0.0002	0.0001	0.0094	0.0004	-99.5936	-106.691	-109.203	-109.106	-105.471	-108.712
33	MB247-shi-n1 (5)	6084	4.0462	2.1104	36.052	TP	0.9964	0.0016	0.0013	0.0007	0	0	-334.546	-342.039	-342.231	-341.808	-367.06	-379.464
33	MB247-shi-n1 (6)	3238	0.9005	1.4115	86.5958	TP	1	0	0	0	0	0	-406.869	-419.685	-446.779	-446.771	-435.954	-457.421
33	MB247-shi-n1 (9)	3848	5.2723	1.8805	40.0933	TP	0.8675	0.0005	0.0699	0.0621	0	0	-258.74	-267.21	-262.332	-261.378	-277.144	-283.398
33	MB247-shi-n2 (0)	8995	0.6208	1.4582	18.3781	TP	1	0	0	0	0	0	-338.114	-358.418	-360.924	-360.555	-370.52	-392.987
33	MB247-shi-n2 (1)	9014	0.4481	1.3317	4.0968	TP	0.9999	0	0	0.0001	0	0	-267.452	-324.178	-286.753	-276.829	-323.185	-335.637
33	MB247-shi-n2 (3)	8526	0.8694	1.9529	62.5774	TP	0.8754	0.1246	0	0	0	0	-368.225	-371.205	-430.641	-430.641	-428.515	-482.145
33	MB247-shi-n2 (4)	3756	3.5096	1.9239	84.4266	TP	0.7541	0.2459	0	0	0	0	-172.168	-174.404	-185.82	-185.808	-192.08	-202.115
33	MB247-shi-n2 (5)	1190	0.5872	1.0357	56.7113	TP	0.997	0	0.0018	0.0008	0.0002	0.0002	-170.088	-184.95	-177.525	-177.255	-179.628	-179.755
33	MB247-shi-n2 (7)	9013	0.4401	1.166	22.8825	TP	1	0	0	0	0	0	-783.159	-854.665	-834.648	-832.758	-847.238	-868.028
33	MB247-shi-n2 (8)	8952	0.4442	1.7023	5.969	TP	1	0	0	0	0	0	-278.106	-306.119	-294.962	-293.724	-342.122	-364.059
33	MB247-shi-n3 (0)	5238	0.7789	1.6206	42.1747	P	0.3928	0.6023	0.0011	0.0002	0.0036	0.0001	-38.8398	-39.8694	-46.2059	-46.2027	-44.9953	-48.665
33	MB247-shi-n3 (1)	908	1.0781	1.4469	44.9248	TP	0.98	0.0187	0.0008	0.0003	0.0002	0	-127.32	-132.419	-135.549	-135.508	-136.774	-143.196
33	MB247-shi-n3 (2)	5098	1.1508	1.681	7.5356	TP	0.8348	0	0.0245	0.1407	0	0	-163.87	-179.646	-168.453	-165.651	-185.812	-190.604
33	MB247-shi-n3 (3)	5201	1.8242	2.2579	15.2255	TP	0.9723	0.0269	0.0006	0.0003	0	0	-165.113	-169.768	-173.591	-173.305	-194.226	-205.421
33	MB247-shi-n3 (4)	5236	0.4401	1.518	5.5014	TP	0.9997	0	0.0001	0.0002	0	0	-182.755	-206.989	-193.072	-191.091	-218.762	-229.34
33	MB247-shi-n3 (5)	1673	1.6424	1.1736	21.2375	TP	0.9612	0	0.0036	0.0351	0	0	-261.312	-285.146	-267.954	-264.621	-279.23	-282.554
33	MB247-shi-n3 (6)	5230	2.0425	1.5725	9.6292	TE	0.3286	0	0	0.6714	0	0	-393.975	-434.013	-404.39	-393.26	-427.103	-432.233
33	MB247-shi-n3 (8)	965	1.0428	1.271	39.2284	TP	0.9992	0.0003	0.0003	0.0001	0.0001	0	-154.677	-164.043	-163.829	-163.525	-165.415	-171.206
33	MB247-shi-n3 (9)	1343	0.4592	1.2694	19.309	TP	0.9977	0	0.0016	0.0007	0	0	-195.714	-211.642	-203.197	-202.958	-210.281	-215.659
33	Shi-+_n1_33degsmaller scale (0)	7332	12.9351	2.4759	47.8698	TP	0.7099	0.0025	0.0913	0.1962	0	0	-241.958	-248.686	-245.092	-243.244	-261.225	-264.722
33	Shi-+_n1_33degsmaller scale (1)	3713	0.4972	1.0386	59.5729	TP	1	0	0	0	0	0	-363.095	-394.684	-389.597	-388.958	-383.99	-389.793
33	Shi-+_n1_33degsmaller scale (3)	6502	0.4679	1.5452	26.3137	TP	1	0	0	0	0	0	-328.411	-341.538	-379.913	-379.888	-376.46	-406.855
33	Shi-+_n1_33degsmaller scale (4)	7332	0.4402	1.2993	19.4283	TP	1	0	0	0	0	0	-694.88	-748.377	-745.65	-744.764	-760.73	-790.866
33	Shi-+_n1_33degsmaller scale (5)	7332	1.2504	1.8367	24.9595	TP	0.9386	0.0188	0.0315	0.0111	0	0	-180.014	-184.994	-184.481	-184.454	-196.698	-206.389
33	Shi-+_n1_33degsmaller scale (6)	2926	0.7527	1.083	30.0733	TP	1	0	0	0	0	0	-265.634	-290.45	-279.001	-277.566	-283.75	-289.111
33	Shi-+_n1_33degsmaller scale (8)	7332	0.4539	1.8568	6.6683	P	0.3404	0.4965	0.1236	0.0289	0.0097	0.001	-14.8218	-15.9387	-17.3292	-17.2891	-19.8788	-22.1954
33	Shi-+_n1_33degsmaller scale (9)	7332	0.4412	1.437	18.7685	TP	1	0	0	0	0	0	-497.513	-527.754	-543.343	-543.109	-553.639	-587.08
33	shi-+_n2_33 (0)	7000	0.4477	1.3466	13.6443	TP	1	0	0	0	0	0	-609.885	-661.878	-648.167	-646.79	-677.727	-704.251
33	shi-+_n2_33 (1)	2538	0.4485	1.1006	24.5508	TP	1	0	0	0	0	0	-198.108	-217.899	-213.767	-212.915	-214.242	-220.165
33	shi-+_n2_33 (4)	7226	0.4535	1.3904	16.5185	TP	1	0	0	0	0	0	-340.373	-364.591	-372.124	-371.679	-386.223	-401.771
33	shi-+_n2_33 (5)	1762	0.886	1.401	45.5447	TP	0.9728	0.0269	0	0	0.0003	0	-110.2	-114.951	-121.88	-121.825	-119.44	-126.814
33	shi-+_n2_33 (51)	3316	0.495	1.4832	31.4411	TP	0.9945	0.0055	0	0	0	0	-151.394	-157.672	-177.427	-177.405	-170.967	-185.475
33	shi-+_n2_33 (6)	2700	0.4436	1.0242	13.0587	TP	0.9999	0	0	0.0001	0	0	-242.601	-276.928	-255.105	-252.089	-264.601	-268.416
33	shi-+_n2_33 (7)	7222	0.4494	1.4865	11.8277	TP	1	0	0	0	0	0	-278.358	-299.118	-312.748	-312.093	-330.436	-348.634
33	shi-+_n2_33 (71)	991	0.4599	2.2989	3.4435	P	0.3281	0.5158	0.1222	0.0324	0.0014	0.0001	-5.5143	-6.487	-7.9272	-7.829	-12.4167	-14.8707
33	shi-+_n2_33 (8)	1665	2.2895	1.9225	42.9767	TP	0.6375	0.3594	0.0023	0.0007	0	0	-93.2358	-94.9962	-100.027	-100.004	-104.525	-110.887
33	shi-+_n3 (0)	7831	4.007	2.5593	36.9852	TP	0.6845	0.303	0.0092	0.0032	0	0	-180.105	-182.004	-185.494	-185.463	-203.979	-212.782
33	shi-+_n3 (1)	7833	2.523	2.5695	41.0754	TP	0.5037	0.4963	0	0	0	0	-196.801	-197.88	-210.722	-210.721	-232.075	-249.545
33	shi-+_n3 (3)	7698	0.7825	1.3523	18.3796	TP	1	0	0	0	0	0	-508.554	-545.618	-528.021	-526.525	-552.157	-568.484
33	shi-+_n3 (4)	1675	0.4603	1.3236	26.1572	TP	0.9981	0.0019	0	0	0	0	-115.779	-123.177	-135.205	-135.016	-131.265	-138.994
33	shi-+_n3 (5)	7583	0.4455	1.3102	6.7066	TP	1	0	0	0	0	0	-402.361	-458.914	-425.469	-419.94	-463.754	-478.61
33	shi-+_n3 (6)	685	0.5566	1.5034	11.8338	TP	0.8139	0.0136	0.1262	0.0458	0.0004	0	-71.5228	-76.7645	-74.5363	-74.3994	-80.2227	-83.3549
33	shi-+_n4_33deg (1)	1119	0.4654	1.2019	29.7532	TP	0.9911	0.0018	0.0044	0.0015	0.0011	0.0001	-96.9047	-104.379	-103.503	-103.398	-104.841	-106.98
33	shi-+_n4_33deg (10)	885	0.4545	1.3398	47.3314	TP	0.9831	0.0169	0	0	0	0	-109.724	-114.932	-128.803	-128.783	-121.933	-128.992
33	shi-+_n4_33deg (2)	3564	0.6013	1.1607	19.4	TP	1	0	0	0	0	0	-333.498	-365.779	-350.138	-348.416	-359.868	-368.81
33	shi-+_n4_33deg (20)	201	0.4605	1.1326	9.6038	TP	0.3905	0.0091	0.3721	0.1467	0.06	0.0217	-36.6656	-41.7952	-38.0865	-37.6445	-39.9118	-40.93
33	shi-+_n4_33deg (22)	2317	1.1616	1.4607	49.6232	TP	0.9913	0.0084	0.0002	0.0001	0	0	-157.653	-163.539	-167.128	-167.091	-169.714	-176.489
33	shi-+_n4_33deg (25)	634	0.4465	1.4414	65.1892	TP	0.5529	0.4458	0	0	0.0013	0	-49.8121	-51.3782	-66.1558	-66.1521	-57.2109	-63.1484
33	shi-+_n4_33deg (3)	3601	0.4889	1.2118	29.45	TP	1	0	0	0	0	0	-341.297	-367.169	-371.174	-370.652	-372.916	-382.955
33	shi-+_n4_33deg (36)	1650	1.0067	2.2081	12.0319	P	0.1045	0.8232	0.0546	0.0051	0.0108	0.0018	-11.7561	-12.0921	-14.8047	-14.7754	-16.4294	-18.2031
33	shi-+_n4_33deg (4)	1862	1.3556	1.6956	60.9767	TP	0.8793	0.1207	0	0	0	0	-157.442	-160.533	-176.218	-176.213	-174.305	-188.281
33	shi-+_n4_33deg (40)	307	0.4436	1.3287	15.2779	P	0.3819	0.5166	0.0364	0.006	0.0479	0.0111	-20.1363	-21.7985	-24.4513	-24.2885	-24.1757	-25.6431
33	shi-+_n4_33deg (42)	243	0.4745	1.1036	13.1337	TP	0.6188	0.0684	0.1762	0.0549	0.0568	0.025	-30.2278	-34.0212	-33.075	-32.6504	-34.2074	-35.0261
33	shi-+_n4_33deg (43)	910	0.5021	1.4028	161.382	P	0.4944	0.503	0	0	0.0026	0	-57.1755	-58.5307	-76.5119	-76.5116	-63.8037	-70.0052
33	shi-+_n4_33deg (49)	652	0.6695	1.7436	9.0242	TP	0.8952	0.051	0.0388	0.015	0	0	-60.6033	-64.6148	-64.8877	-64.6947	-71.6877	-76.6201
33	shi-+_n4_33deg (5)	1042	0.4535	1.5038	33.4567	TP	0.9438	0.0562	0	0	0	0	-103.753	-107.696	-126.77	-126.76	-119.494	-130.818
33	shi-+_n4_33deg (6)	3601	0.4734	1.3428	37.8993	TP	0.9999	0.0001	0	0	0	0	-207.281	-218.04	-241.455	-241.367	-231.16	-244.972
33	shi-+_n4_33deg (8)	1895	2.7008	2.2687	37.4504	TP	0.5948	0.4036	0.0011	0.0004	0	0	-123.52	-125.03	-130.891	-130.879	-141.14	-149.865
22	newBL-rprhidcontrol-1 (0)	3502	0.451	1.9372	34.3752	TP	0.9823	0.0177	0	0	0	0	-400.498	-405.53	-490.861	-490.861	-505.908	-576.544
22	newBL-rprhidcontrol-1 (1)	1058	1.9411	1.5024	21.1544	TP	0.7919	0.0033	0.1229	0.0817	0.0001	0	-109.665	-116.299	-112.678	-111.936	-119.451	-121.99
22	newBL-rprhidcontrol-1 (106)	1276	0.5328	1.4452	71.0848	TP	0.9647	0.0353	0	0	0	0	-146.568	-150.982	-176.303	-176.302	-162.6	-175.76
22	newBL-rprhidcontrol-1 (110)	580	0.4911	1.0507	53.739	TP	0.9638	0.0101	0.0017	0.0005	0.0208	0.0032	-67.9301	-73.8436	-75.6463	-75.4071	-73.1192	-74.9792
22	newBL-rprhidcontrol-1 (119)	456	0.4886	2.3144	18.0808	P	0.0607	0.938	0.0001	0	0.0011	0	-5.5135	-5.5762	-14.9319	-14.9269	-12.3234	-15.5352
22	newBL-rprhidcontrol-1 (120)	1313	0.7185	1.4617	175.811	TP	0.8531	0.1469	0	0	0	0	-150.364	-153.248	-180.938	-180.938	-164.476	-176.728
22	newBL-rprhidcontrol-1 (127)	958	0.8459	1.4918	46.812	TP	0.9716	0.0283	0.0001	0	0	0	-135.314	-139.97	-145.884	-145.876	-146.736	-154.145
22	newBL-rprhidcontrol-1 (141)	519	0.7426	1.1743	20.4171	TP	0.7461	0.0056	0.1657	0.0683	0.0109	0.0035	-66.7848	-72.9456	-69.5498	-69.1761	-72.2742	-73.4121
22	newBL-rprhidcontrol-1 (142)	856	3.1048	1.2663	38.7878	TP	0.5499	0.0221	0.2667	0.1346	0.0214	0.0053	-69.5801	-74.1462	-71.6545	-70.9875	-74.1787	-75.5674
22	newBL-rprhidcontrol-1 (144)	1091	0.4552	1.4243	84.0616	TP	0.8901	0.1099	0	0	0	0	-110.398	-113.636	-141.873	-141.872	-123.832	-135.835
22	newBL-rprhidcontrol-1 (3)	1458	0.5842	1.1805	45.7357	TP	1	0	0	0	0	0	-207.7	-221.997	-222.703	-222.521	-222.157	-227.204
22	newBL-rprhidcontrol-1 (4)	2162	0.7064	2.0533	13.2723	TP	0.9989	0.0011	0	0	0	0	-274.839	-282.644	-303.817	-303.786	-339.2	-373.153
22	newBL-rprhidcontrol-1 (7)	577	1.3328	1.476	53.5815	TP	0.7182	0.2765	0.0021	0.0006	0.0026	0.0001	-64.5416	-66.8278	-71.7188	-71.6741	-71.5085	-75.0562
22	newBL-rprhidcontrol-1 (8)	1415	0.87	1.2514	81.1206	TP	0.9963	0.0037	0	0	0	0	-139.303	-146.056	-157.235	-157.134	-150.395	-156.967
22	newBL-rprhidcontrol-1 (86)	1038	1.5522	1.7975	83.8012	TP	0.622	0.3778	0.0001	0	0.0001	0	-130.896	-132.525	-140.608	-140.608	-141.316	-152.231
22	newBL-rprhidcontrol-1 (9)	3371	0.4452	1.4574	18.9465	TP	1	0	0	0	0	0	-474.043	-501.624	-530.454	-530.203	-536.368	-572.332
22	newBL-rprhidcontrol-1 (92)	696	8.5216	2.2275	156.566	P	0.172	0.819	0.0059	0.0009	0.0021	0.0001	-42.4379	-42.7109	-47.6492	-47.6431	-48.6655	-51.8513
22	newBLsens-rprhidcontrol-1 (0)	3317	0.5137	1.3938	127.47	TP	0.9992	0.0008	0	0	0	0	-304.559	-312.785	-367.731	-367.731	-333.481	-356.098
22	newBLsens-rprhidcontrol-1 (1)	2040	0.4533	1.6388	8.7341	TP	0.9877	0.0122	0	0	0	0	-72.9333	-78.4323	-84.4424	-84.2112	-91.2078	-99.113
22	newBLsens-rprhidcontrol-1 (2)	931	0.531	1.0539	60.6349	TP	0.9951	0.0015	0.0002	0.0001	0.0026	0.0005	-92.4524	-100.169	-102.194	-101.931	-99.6406	-101.37
22	newBLsens-rprhidcontrol-1 (58)	2853	0.442	1.1669	42.7047	TP	1	0	0	0	0	0	-238.223	-255.675	-268.151	-267.816	-260.128	-268.233
22	newBLsens-rprhidcontrol-1 (6)	4795	0.4457	1.2594	82.7428	TP	1	0	0	0	0	0	-368.286	-385.651	-431.82	-431.787	-403.411	-419.189
22	newBLsens-rprhidcontrol-1 (65)	570	0.4586	1.1189	48.9362	TP	0.9397	0.0269	0.0014	0.0004	0.0292	0.0023	-63.1159	-68.0221	-70.9577	-70.8305	-67.9372	-70.4589
22	newBLsens-rprhidcontrol-1 (7)	2983	0.444	1.1373	73.4703	TP	1	0	0	0	0	0	-311.802	-332.592	-338.265	-338.188	-332.641	-336.094
22	newBLsens-rprhidcontrol-1 (8)	3751	0.4407	1.4822	38.466	TP	0.998	0.002	0	0	0	0	-197.233	-204.529	-238.95	-238.94	-224.69	-244.717
22	newBLsens-rprhidcontrol-1 (9)	1364	0.5675	1.0852	83.594	TP	0.9794	0.0012	0.0006	0.0002	0.0175	0.0011	-110.664	-118.616	-119.286	-119.207	-115.901	-118.627
22	newBL-rprhidcontrol-2 (0)	4859	0.4401	1.5469	16.154	TP	1	0	0	0	0	0	-631.086	-665.444	-705.127	-704.897	-729.085	-780.588
22	newBL-rprhidcontrol-2 (1)	2680	0.8059	1.1321	20.2655	TP	0.9801	0	0.0063	0.0136	0	0	-298.377	-327.772	-304.471	-302.653	-319.083	-319.906
22	newBL-rprhidcontrol-2 (2)	7337	0.6157	1.9888	14.8841	TP	1	0	0	0	0	0	-410.204	-421.328	-444.475	-444.466	-493.776	-540.415
22	newBL-rprhidcontrol-2 (4)	626	0.4897	1.3195	57.3092	TP	0.9072	0.091	0	0	0.0017	0	-76.6553	-80.1939	-88.3718	-88.3628	-84.2	-88.3262
22	newBL-rprhidcontrol-2 (5)	1381	0.4525	1.3778	41.9495	TP	0.9985	0.0015	0	0	0	0	-166.668	-174.281	-189.467	-189.455	-183.066	-193.976
22	newBL-rprhidcontrol-2 (6)	1944	0.4691	1.2176	10.4488	TP	0.9708	0	0.0151	0.014	0	0	-131.868	-147.613	-137.114	-136.104	-144.876	-148.375
22	newBL-rprhidcontrol-2 (7)	1251	0.4425	1.4301	35.6472	TP	0.9809	0.0191	0	0	0	0	-115.881	-120.938	-133.311	-133.303	-128.002	-138.02
22	newBL-rprhidcontrol-2 (8)	1043	0.4592	1.1374	35.7993	TP	0.9996	0.0003	0	0	0.0001	0	-110.906	-120.029	-123.425	-123.139	-121.597	-124.609
22	newBL-rprhidcontrol-2 (9)	537	0.5065	1.4628	70.0099	TP	0.5296	0.4701	0	0	0.0003	0	-51.0989	-52.5689	-71.5241	-71.5092	-59.8627	-66.6218
22	newBLsens-rprhidcontrol-2 (0)	2457	0.4637	1.0458	58.1038	TP	1	0	0	0	0	0	-319.344	-347.022	-338.441	-338.069	-339.41	-339.716
22	newBLsens-rprhidcontrol-2 (1)	1031	0.4447	1.4043	22.8659	TP	0.904	0.0959	0	0	0.0001	0	-59.8057	-63.2795	-73.8889	-73.7692	-70.351	-75.9473
22	newBLsens-rprhidcontrol-2 (2)	2080	0.4567	1.2719	38.5612	TP	0.998	0.002	0	0	0	0	-121.499	-128.837	-139.021	-138.937	-133.7	-140.421
22	newBLsens-rprhidcontrol-2 (3)	2612	0.4651	1.2966	121.535	TP	1	0	0	0	0	0	-301.025	-312.2	-345.091	-345.09	-320.205	-336.51
22	newBLsens-rprhidcontrol-2 (4)	1275	0.4738	1.1584	29.1472	TP	1	0	0	0	0	0	-149.3	-161.906	-164.31	-163.883	-164.081	-168.202
22	newBLsens-rprhidcontrol-2 (5)	3274	0.4409	1.9259	52.6429	TP	0.7049	0.2951	0	0	0	0	-219.862	-221.767	-292.533	-292.533	-279.949	-330.869
22	newBLsens-rprhidcontrol-2 (6)	2482	0.4408	1.4123	34.7481	TP	0.9999	0.0001	0	0	0	0	-232.127	-242.819	-262.736	-262.718	-257.184	-272.812
22	newBLsens-rprhidcontrol-2 (7)	6970	0.4837	1.0283	26.4409	TP	1	0	0	0	0	0	-865.408	-960.529	-916.444	-911.681	-940.307	-941.972
22	newBLsens-rprhidcontrol-2 (8)	2517	0.4583	1.101	52.9145	TP	1	0	0	0	0	0	-280.592	-302.766	-295.61	-295.438	-297.53	-298.684
22	newBLsens-rprhidcontrol-2 (9)	5593	3.4206	1.9409	74.4332	P	0.4558	0.5439	0.0002	0.0001	0	0	-79.5953	-80.6904	-88.4384	-88.4197	-90.3562	-96.2611
22	newBlsens-rprhidcontrol-4 (0)	7204	0.4544	1.5582	12.2798	TP	1	0	0	0	0	0	-492.163	-524.064	-541.853	-541.355	-577.545	-611.972
22	newBlsens-rprhidcontrol-4 (2)	1724	1.2136	1.4822	66.8565	TP	0.9793	0.0207	0	0	0	0	-161.608	-166.582	-174.698	-174.684	-174.357	-182.787
22	newBlsens-rprhidcontrol-4 (3)	2515	0.4463	1.4527	65.1336	TP	0.9964	0.0036	0	0	0	0	-219.203	-225.882	-275.066	-275.064	-251.057	-270.35
22	newBlsens-rprhidcontrol-4 (4)	7204	0.4861	1.3218	18.9022	TP	0.9997	0	0.0002	0.0001	0	0	-151.956	-163.327	-161.502	-161.3	-165.988	-172.385
22	newBlsens-rprhidcontrol-4 (5)	4316	1.7749	1.8337	39.5841	TP	0.9812	0.0188	0	0	0	0	-231.784	-236.806	-248.313	-248.27	-258.606	-274.089
22	newBlsens-rprhidcontrol-4 (6)	6643	3.9392	2.0912	96.0738	TP	0.5837	0.4162	0	0	0	0	-174.513	-175.963	-185.228	-185.227	-193.423	-203.906
22	newBlsens-rprhidcontrol-4 (7)	7204	0.445	2.6946	2.1537	TP	0.3715	0.314	0.2319	0.0824	0.0001	0	3.8861	2.4687	2.1655	2.3802	-5.6111	-7.9671
22	newBlsens-rprhidcontrol-4 (8)	4580	0.4476	1.5337	28.023	TP	1	0	0	0	0	0	-408.065	-424.125	-452.208	-452.2	-456.781	-487.052
22	newBlsens-rprhidcontrol-4 (9)	5326	0.4574	1.3396	13.8697	TP	1	0	0	0	0	0	-377.989	-410.274	-403.991	-403.029	-420.814	-438.109
22	newBL-rprhidcontrol-4 (0)	7214	0.4402	1.3891	4.1148	TP	0.908	0.0004	0.0361	0.0555	0	0	-43.6987	-52.4959	-48.0634	-46.4936	-55.3777	-57.6664
22	newBL-rprhidcontrol-4 (1)	2685	0.4449	1.857	5.8687	TP	0.9997	0.0003	0	0	0	0	-105.498	-114.745	-118.013	-117.668	-138.241	-153.933
22	newBL-rprhidcontrol-4 (2)	685	3.0383	1.7892	73.1968	P	0.1198	0.7998	0.0358	0.0033	0.0371	0.0042	-27.247	-27.748	-30.8556	-30.8363	-30.818	-32.9916
22	newBL-rprhidcontrol-4 (3)	7214	0.4466	1.4338	30.4293	TP	1	0	0	0	0	0	-563.422	-589.886	-636.509	-636.449	-630.091	-667.406
22	newBL-rprhidcontrol-4 (4)	880	4.362	2.4772	46.9891	P	0.3178	0.6646	0.0138	0.0038	0.0001	0	-61.1563	-61.7327	-65.6085	-65.5954	-71.1447	-75.3601
22	newBL-rprhidcontrol-4 (5)	2562	2.1265	1.9842	27.4109	TP	0.9681	0.0182	0.0099	0.0038	0	0	-205.339	-210.385	-210.989	-210.881	-226.817	-236.32
22	newBL-rprhidcontrol-4 (8)	2719	0.4441	1.2155	12.9061	TP	1	0	0	0	0	0	-190.12	-210.594	-208.721	-207.228	-217.558	-223.236
22	newBL-rprhidcontrol-4 (9)	6269	0.451	2.1587	16.7701	TP	0.9384	0.0616	0	0	0	0	-224.244	-227.988	-268.542	-268.542	-310.344	-359.314
33	newBL-rprhid-2 (1)	5795	0.4412	1.9361	3.0198	TP	0.9954	0	0.0008	0.0038	0	0	-81.6808	-101.428	-89.8129	-87.2561	-127.318	-139.753
33	newBL-rprhid-2 (2)	7075	0.6003	2.5591	9.3785	TP	0.8714	0.1286	0	0	0	0	-140.833	-143.772	-167.038	-167.037	-225.26	-259.87
33	newBL-rprhid-2 (4)	6581	0.5406	1.5907	8.0768	TP	0.8874	0.0082	0.0729	0.0315	0	0	-66.8856	-72.6941	-70.513	-70.2253	-78.2478	-81.9392
33	newBL-rprhid-2 (5)	7074	0.4507	1.9971	19.9826	TP	0.9999	0.0001	0	0	0	0	-552.942	-563.316	-685.276	-685.276	-728.396	-839.592
33	newBL-rprhid-2 (7)	5611	0.6204	2.0938	37.8738	TP	0.9064	0.0936	0	0	0	0	-412.611	-415.9	-521.702	-521.702	-528.468	-619.253
33	newBL-rprhid-2 (8)	5318	0.8188	2.2457	26.7931	TP	0.9774	0.0226	0	0	0	0	-533.446	-538.228	-617.441	-617.441	-676.466	-761.999
33	newBLsens-rprhid-1 (1)	7209	0.4405	1.9136	0.6301	TP	0.5116	0	0.0001	0.4881	0	0	77.3984	65.6517	67.7882	77.3514	66.9414	66.9378
33	newBLsens-rprhid-1 (2)	2139	1.084	1.9345	40.8443	TP	0.9941	0.0059	0	0	0	0	-448.07	-454.228	-486.311	-486.311	-509.748	-548.895
33	newBLsens-rprhid-1 (5)	1598	0.4401	1.9407	20.62	TP	0.8955	0.1045	0	0	0	0	-156.298	-159.488	-196.971	-196.971	-204.353	-235.32
33	newBL-rprhid-3 (1)	7195	0.4453	2.2907	0.8089	TP	0.508	0.0001	0.0023	0.4895	0.0001	0.0001	54.4432	44.6819	47.9196	54.4062	44.6631	44.4849
33	newBL-rprhid-3 (3)	7247	0.4481	1.5677	1.1537	TP	0.533	0	0.0035	0.4633	0.0001	0.0001	21.987	10.7112	15.8388	21.8469	11.9681	11.728
33	newBLsens-rprhid-2 (1)	6918	0.5548	2.4414	7.9572	TP	0.9956	0.0044	0	0	0	0	-205.575	-212.01	-249.61	-249.594	-325.067	-382.489
33	newBLsens-rprhid-2 (3)	5835	0.4403	2.3149	6.4994	TP	1	0	0	0	0	0	-231.245	-243.263	-308.721	-308.659	-405.885	-494.437
33	newBLsens-rprhid-2 (5)	7202	0.4403	1.8717	0.7079	TP	0.4949	0.0012	0.0073	0.4864	0.0055	0.0047	40.5297	33.249	35.0789	40.5123	34.7821	34.6405
33	newBLsens-rprhid-2 (6)	6982	0.4533	2.7937	0.8259	TP	0.5189	0.001	0.0125	0.4675	0.0001	0	50.6833	43.3155	45.8101	50.579	41.1183	40.2588
33	newBLsens-rprhid-2 (8)	6666	0.8321	1.2533	13.8909	TP	0.9548	0	0.0212	0.0239	0	0	-132.602	-145.555	-137.509	-136.289	-145.036	-147.985
33	newBL-rprhid-4 (2)	4686	0.8301	2.4175	4.4092	TP	0.9947	0	0.0018	0.0034	0	0	-125.62	-137.609	-132.943	-131.297	-175.304	-189.167
33	newBL-rprhid-4 (3)	2260	0.6478	2.4916	9.2831	TP	0.7972	0.2028	0	0	0	0	-104.172	-106.582	-120.284	-120.28	-150.965	-176.231
33	newBL-rprhid-4 (4)	7204	0.4525	2.5979	0.7419	TP	0.5432	0.001	0.0057	0.45	0	0	51.016	43.495	45.2895	50.8278	40.4068	40.1862
33	newBL-rprhid-4 (6)	2774	0.448	1.091	2.7052	TE	0.3451	0.0001	0.1296	0.479	0.0259	0.0203	-21.6885	-30.9394	-23.8817	-21.3608	-25.493	-25.7337
33	newBLsens-rprhid-3 (4)	4582	0.4938	2.8213	4.2156	TP	0.9636	0.0364	0	0	0	0	-25.2308	-29.5321	-49.1722	-49.1108	-115.744	-152.623
33	newBLsens-rprhid-3 (9)	7203	0.4886	2.6396	4.3223	TP	0.9364	0.0636	0	0	0	0	-33.5941	-37.3209	-49.1544	-49.0808	-90.2997	-112.554
33	newBLsens-rprhid-4 (360)	1060	0.44	2.4884	1.4087	TP	0.6829	0.0004	0.0448	0.2719	0	0	30.2115	21.8015	26.4111	29.2905	10.5327	7.4593
