# Supplementary material for: Optimal searching behaviour generated intrinsically by the central pattern generator for locomotion
Source: eLife journal article supplement (doi:10.7554/elife.50316), 2019-11-01
Supplement: supp [file elife-50316-supp-v1.zip › elife_poa_e50316_Supplementary_file_6.xlsx]

## Sheet: Table S6
Supplemental File 6		22-33deg CB AIC
					256	11	0	29	8	0
ToC	Treatment	Treatment (Trial)	Track file	Best fit	TP	P	Exp	CB2	CB3	CB4
22	BL/+ 22 Deg	BL/+ 22 Deg (n1)	BL-+_n1_22deg (1)	TP	0.8664	0.0232	0.0266	0.0726	0.0098	0.0013
22	BL/+ 22 Deg	BL/+ 22 Deg (n1)	BL-+_n1_22deg (13)	TP	0.7814	0.0591	0.0003	0.138	0.0187	0.0025
22	BL/+ 22 Deg	BL/+ 22 Deg (n1)	BL-+_n1_22deg (14)	TP	0.8	0.1181	0.0001	0.0709	0.0096	0.0013
22	BL/+ 22 Deg	BL/+ 22 Deg (n1)	BL-+_n1_22deg (17)	TP	0.9824	0	0.0013	0.0141	0.0019	0.0003
22	BL/+ 22 Deg	BL/+ 22 Deg (n1)	BL-+_n1_22deg (19)	TP	0.8905	0.0507	0.0012	0.0245	0.0302	0.0029
22	BL/+ 22 Deg	BL/+ 22 Deg (n1)	BL-+_n1_22deg (2)	TP	0.6117	0.3318	0	0.049	0.0066	0.0009
22	BL/+ 22 Deg	BL/+ 22 Deg (n1)	BL-+_n1_22deg (4)	TP	0.9836	0	0	0.0141	0.0019	0.0003
22	BL/+ 22 Deg	BL/+ 22 Deg (n1)	BL-+_n1_22deg (6)	TP	0.9963	0	0	0.0028	0.0008	0.0001
22	BL/+ 22 Deg	BL/+ 22 Deg (n1)	BL-+_n1_22deg (7)	CB2	0.3115	0	0	0.5968	0.0808	0.0109
22	BL/+ 22 Deg	BL/+ 22 Deg (n1)	BL-+_n1_22deg (8)	CB2	0.0142	0	0	0.8533	0.1165	0.016
22	BL/+ 22 Deg	BL/+ 22 Deg (n2)	BL-+_n2_22deg (0)	TP	0.9457	0	0	0.0217	0.0285	0.0041
22	BL/+ 22 Deg	BL/+ 22 Deg (n2)	BL-+_n2_22deg (1)	TP	0.9815	0.0015	0.0016	0.0134	0.0018	0.0002
22	BL/+ 22 Deg	BL/+ 22 Deg (n2)	BL-+_n2_22deg (3)	TP	0.9509	0	0	0.0426	0.0058	0.0008
22	BL/+ 22 Deg	BL/+ 22 Deg (n2)	BL-+_n2_22deg (4)	CB2	0.0055	0	0	0.8616	0.1166	0.0163
22	BL/+ 22 Deg	BL/+ 22 Deg (n2)	BL-+_n2_22deg (5)	TP	0.8382	0	0	0.1395	0.0189	0.0034
22	BL/+ 22 Deg	BL/+ 22 Deg (n2)	BL-+_n2_22deg (8)	TP	0.5693	0	0	0.3733	0.0505	0.0068
22	BL/+ 22 Deg	BL/+ 22 Deg (n2)	BL-+_n2_22deg (9)	CB3	0.0454	0.0006	0	0.2745	0.5989	0.0806
22	BL/+ 22 Deg	BL/+ 22 Deg (n3)	BL-+_n3_22deg (1)	TP	0.9576	0.0005	0.0389	0.0019	0.0003	0.0008
22	BL/+ 22 Deg	BL/+ 22 Deg (n3)	BL-+_n3_22deg (112)	TP	0.9956	0.0001	0	0.0037	0.0005	0.0001
22	BL/+ 22 Deg	BL/+ 22 Deg (n3)	BL-+_n3_22deg (135)	TP	0.6922	0.1021	0.1665	0.034	0.0046	0.0006
22	BL/+ 22 Deg	BL/+ 22 Deg (n3)	BL-+_n3_22deg (136)	CB2	0.3496	0.0001	0	0.5612	0.0759	0.0131
22	BL/+ 22 Deg	BL/+ 22 Deg (n3)	BL-+_n3_22deg (141)	P	0.2111	0.4563	0.0038	0.058	0.2311	0.0398
22	BL/+ 22 Deg	BL/+ 22 Deg (n3)	BL-+_n3_22deg (143)	TP	0.7849	0.0822	0	0.003	0.1144	0.0155
22	BL/+ 22 Deg	BL/+ 22 Deg (n3)	BL-+_n3_22deg (163)	TP	0.9056	0.0061	0.0256	0.0543	0.0074	0.001
22	BL/+ 22 Deg	BL/+ 22 Deg (n3)	BL-+_n3_22deg (2)	TP	0.6485	0.2669	0	0.0699	0.013	0.0018
22	BL/+ 22 Deg	BL/+ 22 Deg (n3)	BL-+_n3_22deg (4)	TP	0.8203	0.1385	0	0.0356	0.0049	0.0007
22	BL/+ 22 Deg	BL/+ 22 Deg (n3)	BL-+_n3_22deg (5)	TP	0.8031	0	0	0.1706	0.0231	0.0033
22	BL/+ 22 Deg	BL/+ 22 Deg (n3)	BL-+_n3_22deg (6)	TP	0.9998	0	0	0.0002	0	0
22	BL/+ 22 Deg	BL/+ 22 Deg (n3)	BL-+_n3_22deg (7)	TP	0.5263	0.0504	0.2885	0.1198	0.0136	0.0013
22	BL/+ 22 Deg	BL/+ 22 Deg (n3)	BL-+_n3_22deg (8)	TP	0.9115	0.0394	0.001	0.0395	0.0078	0.0008
22	BL/+ 22 Deg	BL/+ 22 Deg (n3)	MB247-+_n1 (4)	TP	0.6654	0.2651	0.0206	0.0424	0.0057	0.0008
22	shi/+ 22 Deg	shi/+ 22 Deg (n1)	shi-+_n1_22deg (0)	TP	0.6203	0.1611	0	0.1842	0.0304	0.0041
22	shi/+ 22 Deg	shi/+ 22 Deg (n1)	shi-+_n1_22deg (1)	TP	0.8361	0.05	0.0001	0.0207	0.0818	0.0112
22	shi/+ 22 Deg	shi/+ 22 Deg (n1)	shi-+_n1_22deg (19)	TP	0.6903	0.0664	0.0003	0.0107	0.2028	0.0294
22	shi/+ 22 Deg	shi/+ 22 Deg (n1)	shi-+_n1_22deg (2)	TP	0.5053	0.092	0	0.3491	0.0472	0.0064
22	shi/+ 22 Deg	shi/+ 22 Deg (n1)	shi-+_n1_22deg (22)	TP	0.8313	0.0984	0.0049	0.0508	0.013	0.0016
22	shi/+ 22 Deg	shi/+ 22 Deg (n1)	shi-+_n1_22deg (3)	TP	0.8703	0.0668	0	0.0544	0.0075	0.001
22	shi/+ 22 Deg	shi/+ 22 Deg (n1)	shi-+_n1_22deg (30)	CB2	0.1577	0.0059	0	0.7006	0.1228	0.013
22	shi/+ 22 Deg	shi/+ 22 Deg (n1)	shi-+_n1_22deg (4)	TP	0.6841	0	0	0.2739	0.0371	0.005
22	shi/+ 22 Deg	shi/+ 22 Deg (n1)	shi-+_n1_22deg (5)	TP	0.9971	0	0	0.0024	0.0004	0
22	shi/+ 22 Deg	shi/+ 22 Deg (n1)	shi-+_n1_22deg (6)	TP	0.5644	0.0865	0	0.3026	0.0409	0.0055
22	shi/+ 22 Deg	shi/+ 22 Deg (n1)	shi-+_n1_22deg (7)	TP	0.9912	0	0.0023	0.0056	0.0008	0.0001
22	shi/+ 22 Deg	shi/+ 22 Deg (n1)	shi-+_n1_22deg (8)	TP	0.9077	0	0	0.08	0.0108	0.0015
22	shi/+ 22 Deg	shi/+ 22 Deg (n2)	shi-+_n2_22deg (0)	TP	0.7065	0.1942	0.0027	0.0294	0.0664	0.0008
22	shi/+ 22 Deg	shi/+ 22 Deg (n2)	shi-+_n2_22deg (1)	TP	0.6042	0.213	0.1562	0.0221	0.003	0.0015
22	shi/+ 22 Deg	shi/+ 22 Deg (n2)	shi-+_n2_22deg (11)	CB2	0.0181	0.0034	0.0015	0.8469	0.1146	0.0155
22	shi/+ 22 Deg	shi/+ 22 Deg (n2)	shi-+_n2_22deg (12)	CB2	0.0935	0	0	0.7858	0.1063	0.0144
22	shi/+ 22 Deg	shi/+ 22 Deg (n2)	shi-+_n2_22deg (16)	TP	0.4765	0.2679	0.0107	0.2119	0.0287	0.0043
22	shi/+ 22 Deg	shi/+ 22 Deg (n2)	shi-+_n2_22deg (18)	TP	0.6789	0.0066	0.002	0.2709	0.0367	0.005
22	shi/+ 22 Deg	shi/+ 22 Deg (n2)	shi-+_n2_22deg (2)	CB3	0.3147	0.021	0.0841	0.0042	0.5073	0.0686
22	shi/+ 22 Deg	shi/+ 22 Deg (n2)	shi-+_n2_22deg (27)	CB2	0.0409	0	0	0.8067	0.1109	0.0415
22	shi/+ 22 Deg	shi/+ 22 Deg (n2)	shi-+_n2_22deg (30)	TP	0.5705	0.0662	0.3073	0.0483	0.0068	0.0009
22	shi/+ 22 Deg	shi/+ 22 Deg (n2)	shi-+_n2_22deg (31)	CB3	0.3041	0.0083	0.0001	0.0231	0.664	0.0004
22	shi/+ 22 Deg	shi/+ 22 Deg (n2)	shi-+_n2_22deg (4)	TP	0.8103	0	0	0.1644	0.0222	0.003
22	shi/+ 22 Deg	shi/+ 22 Deg (n2)	shi-+_n2_22deg (9)	TP	0.928	0	0.0457	0.0023	0.0211	0.0029
22	shi/+ 22 Deg	shi/+ 22 Deg (n3)	shi-+_n3_22deg (0)	TP	0.7049	0.0509	0.0598	0.1592	0.0222	0.003
22	shi/+ 22 Deg	shi/+ 22 Deg (n3)	shi-+_n3_22deg (1)	TP	0.6439	0.0345	0.002	0.0665	0.2515	0.0017
22	shi/+ 22 Deg	shi/+ 22 Deg (n3)	shi-+_n3_22deg (12)	TP	0.6188	0.2322	0.0022	0.1272	0.0172	0.0023
22	shi/+ 22 Deg	shi/+ 22 Deg (n3)	shi-+_n3_22deg (124)	TP	0.7002	0.0637	0	0.2046	0.0277	0.0037
22	shi/+ 22 Deg	shi/+ 22 Deg (n3)	shi-+_n3_22deg (16)	TP	0.9997	0	0	0.0002	0.0001	0
22	shi/+ 22 Deg	shi/+ 22 Deg (n3)	shi-+_n3_22deg (17)	TP	0.7178	0.0617	0.1208	0.0864	0.0117	0.0016
22	shi/+ 22 Deg	shi/+ 22 Deg (n3)	shi-+_n3_22deg (2)	TP	0.8665	0	0	0.1157	0.0157	0.0021
22	shi/+ 22 Deg	shi/+ 22 Deg (n3)	shi-+_n3_22deg (3)	TP	0.9029	0	0.0003	0.0839	0.0114	0.0015
22	shi/+ 22 Deg	shi/+ 22 Deg (n3)	shi-+_n3_22deg (8)	TP	0.994	0.0004	0	0.0049	0.0007	0.0001
22	shi/+ 22 Deg	shi/+ 22 Deg (n3)	shi-+_n3_22deg (9)	CB2	0.3745	0	0	0.5422	0.0734	0.01
33	BL/+ 33 Deg	BL/+ 33 Deg (n1)	1_DROS_DEC2014 (1)	TP	0.5801	0.0019	0.0017	0.0246	0.3452	0.0466
33	BL/+ 33 Deg	BL/+ 33 Deg (n1)	1_DROS_DEC2014 (3)	TP	0.9999	0	0	0.0001	0	0
33	BL/+ 33 Deg	BL/+ 33 Deg (n1)	1_DROS_DEC2014 (4)	TP	0.9972	0	0.0027	0.0001	0	0
33	BL/+ 33 Deg	BL/+ 33 Deg (n1)	1_DROS_DEC2014 (5)	TP	0.988	0	0	0.0104	0.0014	0.0002
33	BL/+ 33 Deg	BL/+ 33 Deg (n1)	1_DROS_DEC2014 (542)	TP	0.8746	0.0077	0.0848	0.0285	0.0039	0.0005
33	BL/+ 33 Deg	BL/+ 33 Deg (n1)	1_DROS_DEC2014 (549)	TP	0.7874	0.1113	0.0016	0.0856	0.0116	0.0024
33	BL/+ 33 Deg	BL/+ 33 Deg (n1)	1_DROS_DEC2014 (551)	TP	0.7235	0.0059	0.2046	0.0571	0.0078	0.0011
33	BL/+ 33 Deg	BL/+ 33 Deg (n1)	1_DROS_DEC2014 (563)	TP	0.5459	0	0	0.3936	0.0533	0.0072
33	BL/+ 33 Deg	BL/+ 33 Deg (n1)	1_DROS_DEC2014 (584)	TP	0.886	0.0002	0.0001	0.0902	0.0209	0.0026
33	BL/+ 33 Deg	BL/+ 33 Deg (n1)	1_DROS_DEC2014 (6)	TP	0.5209	0.1585	0.2908	0.0241	0.0033	0.0024
33	BL/+ 33 Deg	BL/+ 33 Deg (n1)	1_DROS_DEC2014 (9)	TP	0.9996	0	0	0.0003	0.0001	0
33	BL/+ 33 Deg	BL/+ 33 Deg (n2)	1A_DROS_BL-+_n2 (1)	TP	0.9467	0	0	0.0462	0.0063	0.0008
33	BL/+ 33 Deg	BL/+ 33 Deg (n2)	1A_DROS_BL-+_n2 (2)	CB2	0.0188	0	0	0.8505	0.1151	0.0156
33	BL/+ 33 Deg	BL/+ 33 Deg (n2)	1A_DROS_BL-+_n2 (4)	CB2	0.1753	0	0	0.7149	0.0967	0.0131
33	BL/+ 33 Deg	BL/+ 33 Deg (n2)	1A_DROS_BL-+_n2 (5)	CB2	0.2498	0	0.0006	0.6497	0.0879	0.0119
33	BL/+ 33 Deg	BL/+ 33 Deg (n2)	1A_DROS_BL-+_n2 (6)	TP	0.9836	0	0.0123	0.0006	0.0034	0
33	BL/+ 33 Deg	BL/+ 33 Deg (n2)	1A_DROS_BL-+_n2 (8)	TP	0.6372	0.3167	0.002	0.0382	0.0052	0.0008
33	BL/+ 33 Deg	BL/+ 33 Deg (n2)	1A_DROS_BL-+_n2 (9)	TP	0.7929	0	0	0.1499	0.0545	0.0027
33	BL/+ 33 Deg	BL/+ 33 Deg (n3)	1B_DROS_BL-+_n3 (0)	TP	0.6427	0.1097	0.2086	0.0338	0.0046	0.0006
33	BL/+ 33 Deg	BL/+ 33 Deg (n3)	1B_DROS_BL-+_n3 (14)	TP	0.8643	0.0086	0.0917	0.0307	0.0042	0.0006
33	BL/+ 33 Deg	BL/+ 33 Deg (n3)	1B_DROS_BL-+_n3 (18)	TP	0.9997	0	0	0.0002	0	0
33	BL/+ 33 Deg	BL/+ 33 Deg (n3)	1B_DROS_BL-+_n3 (2)	TP	1	0	0	0	0	0
33	BL/+ 33 Deg	BL/+ 33 Deg (n3)	1B_DROS_BL-+_n3 (22)	TP	0.9704	0	0	0.025	0.0034	0.0012
33	BL/+ 33 Deg	BL/+ 33 Deg (n3)	1B_DROS_BL-+_n3 (23)	P	0.3678	0.5726	0	0.0042	0.0516	0.0038
33	BL/+ 33 Deg	BL/+ 33 Deg (n3)	1B_DROS_BL-+_n3 (29)	TP	0.6036	0	0	0.3436	0.0465	0.0063
33	BL/+ 33 Deg	BL/+ 33 Deg (n3)	1B_DROS_BL-+_n3 (53)	TP	0.8875	0.0163	0.0519	0.0384	0.0052	0.0007
33	BL/+ 33 Deg	BL/+ 33 Deg (n3)	1B_DROS_BL-+_n3 (58)	TP	0.9956	0	0	0.0037	0.0006	0.0001
33	BL/+ 33 Deg	BL/+ 33 Deg (n3)	1B_DROS_BL-+_n3 (61)	TP	0.9932	0	0.0005	0.0054	0.0007	0.0001
33	BL/+ 33 Deg	BL/+ 33 Deg (n3)	1B_DROS_BL-+_n3 (66)	TP	0.9368	0.0006	0.001	0.047	0.0137	0.0009
33	BL/+ 33 Deg	BL/+ 33 Deg (n3)	1B_DROS_BL-+_n3 (67)	TP	0.9663	0.0007	0.0107	0.0194	0.0026	0.0004
33	BL/+ 33 Deg	BL/+ 33 Deg (n3)	1B_DROS_BL-+_n3 (68)	TP	0.5368	0.4229	0.0005	0.0274	0.0114	0.0009
33	BL/+ 33 Deg	BL/+ 33 Deg (n3)	1B_DROS_BL-+_n3 (7)	TP	0.9981	0	0.0018	0.0001	0	0
33	BL/+ 33 Deg	BL/+ 33 Deg (n3)	1B_DROS_BL-+_n3 (9)	TP	0.9986	0	0.0012	0.0002	0	0
33	BLsens-shi	BLsens-shi (n1)	2_DROS_DEC2014 (10)	TP	0.7708	0.1456	0.0337	0.0433	0.0059	0.0008
33	BLsens-shi	BLsens-shi (n1)	2_DROS_DEC2014 (12)	CB2	0.2565	0.0004	0	0.6444	0.0869	0.0118
33	BLsens-shi	BLsens-shi (n1)	2_DROS_DEC2014 (15)	CB2	0.034	0.0006	0	0.7497	0.1906	0.0251
33	BLsens-shi	BLsens-shi (n1)	2_DROS_DEC2014 (16)	CB2	0.1245	0	0	0.7589	0.1027	0.0139
33	BLsens-shi	BLsens-shi (n1)	2_DROS_DEC2014 (18)	P	0.3909	0.595	0	0.0055	0.0076	0.001
33	BLsens-shi	BLsens-shi (n1)	2_DROS_DEC2014 (355)	TP	0.5084	0.3305	0.119	0.0366	0.005	0.0007
33	BLsens-shi	BLsens-shi (n2)	2A_DROS_BLsens-shi_n2 (1)	TP	0.5269	0.0333	0.1936	0.2353	0.0054	0.0055
33	BLsens-shi	BLsens-shi (n2)	2A_DROS_BLsens-shi_n2 (2)	TP	0.5778	0.2104	0.0411	0.0213	0.1429	0.0065
33	BLsens-shi	BLsens-shi (n2)	2A_DROS_BLsens-shi_n2 (6)	CB2	0.2982	0.0302	0	0.5808	0.0796	0.0112
33	BLsens-shi	BLsens-shi (n2)	2A_DROS_BLsens-shi_n2 (7)	TP	0.7681	0.1058	0.0779	0.0417	0.0056	0.0008
33	BLsens-shi	BLsens-shi (n2)	2A_DROS_BLsens-shi_n2 (9)	CB3	0.3505	0.0041	0.0032	0.0199	0.6045	0.0178
33	BL-shi	BL-shi (n1)	3_DROS_DEC2014 (0)	CB2	0.2566	0	0	0.6444	0.0872	0.0118
33	BL-shi	BL-shi (n1)	3_DROS_DEC2014 (1)	TP	0.9876	0.0001	0	0.0106	0.0014	0.0003
33	BL-shi	BL-shi (n1)	3_DROS_DEC2014 (25)	TP	0.6827	0.0051	0.2952	0.0147	0.002	0.0003
33	BL-shi	BL-shi (n1)	3_DROS_DEC2014 (326)	TP	0.8933	0.0471	0.0154	0.0383	0.0052	0.0007
33	BL-shi	BL-shi (n1)	3_DROS_DEC2014 (4)	TP	0.4353	0.1818	0.2581	0.1082	0.0146	0.0019
33	BL-shi	BL-shi (n1)	3_DROS_DEC2014 (5)	TP	0.9231	0.0009	0.0567	0.0169	0.0023	0.0002
33	BL-shi	BL-shi (n2)	4_DROS_DEC2014 (0)	TP	0.9898	0	0	0.0088	0.0012	0.0002
33	BL-shi	BL-shi (n2)	4_DROS_DEC2014 (5)	TP	0.9996	0	0	0.0003	0	0
33	BL-shi	BL-shi (n2)	4_DROS_DEC2014 (519)	TP	0.8809	0.0011	0.0093	0.0942	0.0128	0.0017
33	BL-shi	BL-shi (n2)	4_DROS_DEC2014 (534)	TP	0.7001	0.2494	0.0001	0.0427	0.0066	0.001
33	BL-shi	BL-shi (n2)	4_DROS_DEC2014 (535)	TP	0.6051	0.0063	0.0846	0.2635	0.0356	0.005
33	BL-shi	BL-shi (n2)	4_DROS_DEC2014 (7)	TP	1	0	0	0	0	0
33	BL-shi	BL-shi (n2)	4_DROS_DEC2014 (8)	TP	0.9847	0	0	0.0131	0.0018	0.0004
33	BL-shi	BL-shi (n3)	5_DROS_BL-shi_n3 (10)	TP	0.9962	0	0.0034	0.0002	0.0002	0
33	BL-shi	BL-shi (n3)	5_DROS_BL-shi_n3 (15)	TP	0.9999	0	0	0.0001	0	0
33	BL-shi	BL-shi (n3)	5_DROS_BL-shi_n3 (2)	TP	1	0	0	0	0	0
33	BL-shi	BL-shi (n3)	5_DROS_BL-shi_n3 (203)	TP	0.9888	0.0002	0.0103	0.0005	0.0001	0
33	BL-shi	BL-shi (n3)	5_DROS_BL-shi_n3 (209)	TP	0.9997	0	0	0	0.0003	0
33	BL-shi	BL-shi (n3)	5_DROS_BL-shi_n3 (24)	TP	0.9879	0.001	0.0001	0.0087	0.0021	0.0002
33	BL-shi	BL-shi (n3)	5_DROS_BL-shi_n3 (467)	CB2	0.1397	0	0	0.746	0.101	0.0134
33	BL-shi	BL-shi (n3)	5_DROS_BL-shi_n3 (474)	TP	0.6868	0.0636	0.1944	0.0478	0.0065	0.0009
33	BL-shi	BL-shi (n3)	5_DROS_BL-shi_n3 (482)	TP	0.617	0.0136	0.0473	0.2319	0.0701	0.0201
33	BL-shi	BL-shi (n3)	5_DROS_BL-shi_n3 (496)	CB2	0.038	0.0055	0.0181	0.8134	0.1101	0.0148
33	BL-shi	BL-shi (n3)	5_DROS_BL-shi_n3 (549)	CB2	0.0602	0.0179	0.0174	0.7837	0.1064	0.0144
33	BL-shi	BL-shi (n3)	5_DROS_BL-shi_n3 (557)	TP	0.8585	0.0282	0.0239	0.0775	0.0105	0.0014
33	BL-shi	BL-shi (n3)	5_DROS_BL-shi_n3 (81)	TP	0.9704	0	0	0.0257	0.0035	0.0005
33	shi/+ 33 Deg	shi/+ 33 Deg (n1)	Shi-+_n1_33degsmaller scale (0)	TP	0.8857	0.0029	0.1048	0.0052	0.0007	0.0007
33	shi/+ 33 Deg	shi/+ 33 Deg (n1)	Shi-+_n1_33degsmaller scale (1)	TP	0.9954	0	0	0.004	0.0005	0.0001
33	shi/+ 33 Deg	shi/+ 33 Deg (n1)	Shi-+_n1_33degsmaller scale (3)	TP	0.9924	0	0	0.0041	0.0031	0.0004
33	shi/+ 33 Deg	shi/+ 33 Deg (n1)	Shi-+_n1_33degsmaller scale (4)	TP	0.9988	0	0	0.0011	0.0001	0
33	shi/+ 33 Deg	shi/+ 33 Deg (n1)	Shi-+_n1_33degsmaller scale (5)	TP	0.7532	0.0141	0.0235	0.1811	0.0248	0.0034
33	shi/+ 33 Deg	shi/+ 33 Deg (n1)	Shi-+_n1_33degsmaller scale (6)	TP	0.9987	0	0	0.0011	0.0001	0
33	shi/+ 33 Deg	shi/+ 33 Deg (n1)	Shi-+_n1_33degsmaller scale (8)	CB3	0.2039	0.1814	0.0452	0.0145	0.5285	0.0266
33	shi/+ 33 Deg	shi/+ 33 Deg (n1)	Shi-+_n1_33degsmaller scale (9)	TP	0.9981	0	0	0.0016	0.0002	0
33	shi/+ 33 Deg	shi/+ 33 Deg (n2)	shi-+_n2_33 (0)	TP	0.9988	0	0	0.0011	0.0001	0
33	shi/+ 33 Deg	shi/+ 33 Deg (n2)	shi-+_n2_33 (1)	TP	0.9991	0	0	0.0008	0.0001	0
33	shi/+ 33 Deg	shi/+ 33 Deg (n2)	shi-+_n2_33 (4)	CB2	0.4368	0	0	0.4882	0.0661	0.0089
33	shi/+ 33 Deg	shi/+ 33 Deg (n2)	shi-+_n2_33 (5)	TP	0.9413	0.0221	0	0.0299	0.0059	0.0008
33	shi/+ 33 Deg	shi/+ 33 Deg (n2)	shi-+_n2_33 (51)	TP	0.6988	0.0036	0	0.0045	0.2563	0.0368
33	shi/+ 33 Deg	shi/+ 33 Deg (n2)	shi-+_n2_33 (6)	TP	0.9998	0	0	0.0001	0	0
33	shi/+ 33 Deg	shi/+ 33 Deg (n2)	shi-+_n2_33 (7)	TP	0.849	0	0	0.1309	0.0177	0.0024
33	shi/+ 33 Deg	shi/+ 33 Deg (n2)	shi-+_n2_33 (71)	P	0.4223	0.434	0.1028	0.0354	0.0048	0.0006
33	shi/+ 33 Deg	shi/+ 33 Deg (n2)	shi-+_n2_33 (8)	TP	0.6333	0.296	0.0019	0.0257	0.0376	0.0054
33	shi/+ 33 Deg	shi/+ 33 Deg (n3)	shi-+_n3 (0)	TP	0.6644	0.2703	0.0082	0.0495	0.0067	0.0009
33	shi/+ 33 Deg	shi/+ 33 Deg (n3)	shi-+_n3 (1)	TP	0.4936	0.456	0	0.0437	0.0059	0.0008
33	shi/+ 33 Deg	shi/+ 33 Deg (n3)	shi-+_n3 (3)	TP	0.9978	0	0	0.0018	0.0003	0.0001
33	shi/+ 33 Deg	shi/+ 33 Deg (n3)	shi-+_n3 (4)	TP	0.9918	0.0017	0	0.0036	0.0026	0.0003
33	shi/+ 33 Deg	shi/+ 33 Deg (n3)	shi-+_n3 (5)	TP	1	0	0	0	0	0
33	shi/+ 33 Deg	shi/+ 33 Deg (n3)	shi-+_n3 (6)	TP	0.721	0.0104	0.0963	0.1494	0.0202	0.0027
33	shi/+ 33 Deg	shi/+ 33 Deg (n4)	shi-+_n4_33deg (1)	TP	0.7706	0.0012	0.0029	0.1933	0.0285	0.0035
33	shi/+ 33 Deg	shi/+ 33 Deg (n4)	shi-+_n4_33deg (10)	TP	0.9458	0.0141	0	0.0346	0.0048	0.0007
33	shi/+ 33 Deg	shi/+ 33 Deg (n4)	shi-+_n4_33deg (2)	TP	0.9994	0	0	0.0005	0.0001	0
33	shi/+ 33 Deg	shi/+ 33 Deg (n4)	shi-+_n4_33deg (20)	TP	0.5763	0.0093	0.3783	0.0313	0.0042	0.0006
33	shi/+ 33 Deg	shi/+ 33 Deg (n4)	shi-+_n4_33deg (22)	TP	0.8824	0.0067	0.0002	0.0959	0.013	0.0018
33	shi/+ 33 Deg	shi/+ 33 Deg (n4)	shi-+_n4_33deg (25)	CB3	0.0026	0.0015	0	0.0001	0.6892	0.3066
33	shi/+ 33 Deg	shi/+ 33 Deg (n4)	shi-+_n4_33deg (3)	TP	0.7582	0	0	0.2096	0.0284	0.0038
33	shi/+ 33 Deg	shi/+ 33 Deg (n4)	shi-+_n4_33deg (36)	P	0.3089	0.6	0.0398	0.035	0.005	0.0113
33	shi/+ 33 Deg	shi/+ 33 Deg (n4)	shi-+_n4_33deg (4)	TP	0.8507	0.1052	0	0.0374	0.0057	0.0011
33	shi/+ 33 Deg	shi/+ 33 Deg (n4)	shi-+_n4_33deg (40)	TP	0.5928	0.3057	0.0215	0.0692	0.0094	0.0013
33	shi/+ 33 Deg	shi/+ 33 Deg (n4)	shi-+_n4_33deg (42)	TP	0.7162	0.0438	0.1129	0.0271	0.0995	0.0005
33	shi/+ 33 Deg	shi/+ 33 Deg (n4)	shi-+_n4_33deg (43)	TP	0.5784	0.4055	0	0.0055	0.0093	0.0013
33	shi/+ 33 Deg	shi/+ 33 Deg (n4)	shi-+_n4_33deg (49)	TP	0.8919	0.0439	0.0334	0.0267	0.0036	0.0005
33	shi/+ 33 Deg	shi/+ 33 Deg (n4)	shi-+_n4_33deg (5)	TP	0.8419	0.0444	0	0.0074	0.1055	0.0009
33	shi/+ 33 Deg	shi/+ 33 Deg (n4)	shi-+_n4_33deg (6)	TP	0.9956	0.0001	0	0.0012	0.0027	0.0004
33	shi/+ 33 Deg	shi/+ 33 Deg (n4)	shi-+_n4_33deg (8)	TP	0.5794	0.3479	0.001	0.0621	0.0084	0.0011
33	MB247/+	MB247/+ (n1)	MB247-+_n1 (5)	TP	0.4929	0.4643	0	0	0.0376	0.0051
33	MB247/+	MB247/+ (n1)	MB247-+_n1 (6)	TP	0.9871	0	0	0.0111	0.0015	0.0003
33	MB247/+	MB247/+ (n1)	MB247-+_n1 (8)	TP	1	0	0	0	0	0
33	MB247/+	MB247/+ (n1)	MB247-+_n1 (9)	TP	0.9983	0	0	0.0015	0.0002	0
33	MB247/+	MB247/+ (n2)	MB247-+_n2 (12)	TP	0.7812	0.1215	0.0528	0.0363	0.0074	0.0007
33	MB247/+	MB247/+ (n2)	MB247-+_n2 (13)	TP	0.9481	0.0006	0.023	0.0246	0.0033	0.0004
33	MB247/+	MB247/+ (n2)	MB247-+_n2 (14)	P	0.2569	0.6082	0.023	0.097	0.0131	0.0018
33	MB247/+	MB247/+ (n2)	MB247-+_n2 (3)	TP	0.9903	0	0	0.0033	0.0058	0.0007
33	MB247/+	MB247/+ (n2)	MB247-+_n2 (4)	TP	0.9987	0.0002	0	0.001	0.0001	0
33	MB247/+	MB247/+ (n2)	MB247-+_n2 (450)	TP	0.687	0.0054	0.001	0.2617	0.0356	0.0093
33	MB247/+	MB247/+ (n2)	MB247-+_n2 (5)	TP	1	0	0	0	0	0
33	MB247/+	MB247/+ (n2)	MB247-+_n2 (6)	TP	0.9998	0	0	0.0002	0	0
33	MB247/+	MB247/+ (n2)	MB247-+_n2 (631)	TP	0.599	0.3117	0	0.0774	0.0105	0.0014
33	MB247/+	MB247/+ (n3)	MB247-+_n3 (0)	TP	0.4832	0.0023	0.3458	0.1661	0.0023	0.0003
33	MB247/+	MB247/+ (n3)	MB247-+_n3 (1)	TP	0.9244	0.0005	0.071	0.0035	0.0005	0.0001
33	MB247/+	MB247/+ (n3)	MB247-+_n3 (2)	TP	0.9983	0	0	0.0013	0.0004	0
33	MB247/+	MB247/+ (n3)	MB247-+_n3 (3)	TP	0.3826	0.3642	0	0.0491	0.1872	0.0169
33	MB247/+	MB247/+ (n3)	MB247-+_n3 (4)	CB3	0.0483	0	0	0.072	0.785	0.0947
33	MB247/+	MB247/+ (n3)	MB247-+_n3 (5)	TP	0.9405	0	0	0.0515	0.007	0.0009
33	MB247/+	MB247/+ (n3)	MB247-+_n3 (6)	TP	0.9825	0	0	0.015	0.002	0.0005
33	MB247/+	MB247/+ (n3)	MB247-+_n3 (8)	TP	0.9991	0	0	0.0008	0.0001	0
33	MB247/+	MB247/+ (n3)	MB247-+_n3 (9)	P	0.2847	0.6446	0	0.0375	0.032	0.0012
33	MB247-shi	MB247-shi (n1)	MB247-shi-n1 (0)	TP	0.9555	0	0	0.0323	0.0115	0.0006
33	MB247-shi	MB247-shi (n1)	MB247-shi-n1 (1)	TP	0.7064	0.2547	0	0.0319	0.0064	0.0006
33	MB247-shi	MB247-shi (n1)	MB247-shi-n1 (2)	TP	0.4075	0.1543	0.1533	0.2407	0.0354	0.0089
33	MB247-shi	MB247-shi (n1)	MB247-shi-n1 (4)	TP	0.8206	0.0018	0.0001	0.1537	0.0208	0.0028
33	MB247-shi	MB247-shi (n1)	MB247-shi-n1 (5)	TP	0.9854	0.0015	0.0012	0.0103	0.0014	0.0002
33	MB247-shi	MB247-shi (n1)	MB247-shi-n1 (6)	TP	0.7202	0	0	0.2417	0.0327	0.0053
33	MB247-shi	MB247-shi (n1)	MB247-shi-n1 (9)	TP	0.9166	0.0005	0.0687	0.0123	0.0017	0.0002
33	MB247-shi	MB247-shi (n2)	MB247-shi-n2 (0)	TP	0.9965	0	0	0.003	0.0004	0.0001
33	MB247-shi	MB247-shi (n2)	MB247-shi-n2 (1)	TP	1	0	0	0	0	0
33	MB247-shi	MB247-shi (n2)	MB247-shi-n2 (3)	TP	0.6541	0.0903	0	0.1461	0.0964	0.013
33	MB247-shi	MB247-shi (n2)	MB247-shi-n2 (4)	TP	0.7277	0.2115	0	0.0506	0.0089	0.0012
33	MB247-shi	MB247-shi (n2)	MB247-shi-n2 (5)	TP	0.5269	0	0.001	0.4092	0.0554	0.0076
33	MB247-shi	MB247-shi (n2)	MB247-shi-n2 (7)	TP	1	0	0	0	0	0
33	MB247-shi	MB247-shi (n2)	MB247-shi-n2 (8)	TP	0.9438	0	0	0.0487	0.0066	0.0009
33	MB247-shi	MB247-shi (n3)	MB247-shi-n3 (0)	TP	0.4662	0.4526	0.0008	0.0421	0.0338	0.0046
33	MB247-shi	MB247-shi (n3)	MB247-shi-n3 (1)	TP	0.9395	0.0156	0.0007	0.0211	0.02	0.0031
33	MB247-shi	MB247-shi (n3)	MB247-shi-n3 (2)	TP	0.9715	0	0.027	0.0013	0.0002	0
33	MB247-shi	MB247-shi (n3)	MB247-shi-n3 (3)	TP	0.9547	0.0247	0.0005	0.0174	0.0024	0.0003
33	MB247-shi	MB247-shi (n3)	MB247-shi-n3 (4)	TP	0.9855	0	0.0001	0.0122	0.0017	0.0005
33	MB247-shi	MB247-shi (n3)	MB247-shi-n3 (5)	TP	0.9926	0	0.0035	0.0002	0.0033	0.0004
33	MB247-shi	MB247-shi (n3)	MB247-shi-n3 (6)	TP	0.9999	0	0.0001	0	0	0
33	MB247-shi	MB247-shi (n3)	MB247-shi-n3 (8)	TP	0.9895	0.0002	0.0003	0.0073	0.0026	0.0001
33	MB247-shi	MB247-shi (n3)	MB247-shi-n3 (9)	CB2	0.3036	0	0.0005	0.5917	0.0801	0.0242
22	New Blsens-rprhid_control	New Blsens-rprhid_control (n1)	newBL-rprhidcontrol-1 (0)	CB3	0.2366	0.0042	0	0.0042	0.6671	0.0878
22	New Blsens-rprhid_control	New Blsens-rprhid_control (n1)	newBL-rprhidcontrol-1 (1)	TP	0.8701	0.0031	0.1162	0.0062	0.0038	0.0005
22	New Blsens-rprhid_control	New Blsens-rprhid_control (n1)	newBL-rprhidcontrol-1 (106)	TP	0.9601	0.0316	0	0.0021	0.0054	0.0008
22	New Blsens-rprhid_control	New Blsens-rprhid_control (n1)	newBL-rprhidcontrol-1 (110)	TP	0.8449	0.0065	0.0011	0.1279	0.0173	0.0023
22	New Blsens-rprhid_control	New Blsens-rprhid_control (n1)	newBL-rprhidcontrol-1 (119)	P	0.1583	0.4042	0	0.3425	0.0463	0.0486
22	New Blsens-rprhid_control	New Blsens-rprhid_control (n1)	newBL-rprhidcontrol-1 (120)	TP	0.8312	0.1263	0	0.0121	0.006	0.0244
22	New Blsens-rprhid_control	New Blsens-rprhid_control (n1)	newBL-rprhidcontrol-1 (127)	TP	0.8659	0.0224	0.0001	0.0939	0.0157	0.0021
22	New Blsens-rprhid_control	New Blsens-rprhid_control (n1)	newBL-rprhidcontrol-1 (141)	TP	0.793	0.0045	0.1358	0.0577	0.0079	0.001
22	New Blsens-rprhid_control	New Blsens-rprhid_control (n1)	newBL-rprhidcontrol-1 (142)	TP	0.7064	0.02	0.2413	0.028	0.0038	0.0005
22	New Blsens-rprhid_control	New Blsens-rprhid_control (n1)	newBL-rprhidcontrol-1 (144)	TP	0.8919	0.0951	0	0.005	0.007	0.0009
22	New Blsens-rprhid_control	New Blsens-rprhid_control (n1)	newBL-rprhidcontrol-1 (3)	TP	0.9057	0	0	0.0817	0.0111	0.0015
22	New Blsens-rprhid_control	New Blsens-rprhid_control (n1)	newBL-rprhidcontrol-1 (4)	TP	0.9754	0.0011	0	0.0204	0.0028	0.0004
22	New Blsens-rprhid_control	New Blsens-rprhid_control (n1)	newBL-rprhidcontrol-1 (7)	TP	0.671	0.1854	0.0014	0.0161	0.1114	0.0147
22	New Blsens-rprhid_control	New Blsens-rprhid_control (n1)	newBL-rprhidcontrol-1 (8)	TP	0.9857	0.0031	0	0.0076	0.0032	0.0004
22	New Blsens-rprhid_control	New Blsens-rprhid_control (n1)	newBL-rprhidcontrol-1 (86)	TP	0.5972	0.3184	0.0001	0.0239	0.0532	0.0072
22	New Blsens-rprhid_control	New Blsens-rprhid_control (n1)	newBL-rprhidcontrol-1 (9)	TP	0.9994	0	0	0.0005	0.0001	0
22	New Blsens-rprhid_control	New Blsens-rprhid_control (n1)	newBL-rprhidcontrol-1 (92)	P	0.3062	0.6335	0.0045	0.0464	0.007	0.0024
22	New Blsens-rprhid_control	New Blsens-rprhid_control (n1)	newBLsens-rprhidcontrol-1 (0)	TP	0.949	0.0007	0	0.0096	0.04	0.0007
22	New Blsens-rprhid_control	New Blsens-rprhid_control (n1)	newBLsens-rprhidcontrol-1 (1)	TP	0.9761	0.0109	0	0.0113	0.0015	0.0002
22	New Blsens-rprhid_control	New Blsens-rprhid_control (n1)	newBLsens-rprhidcontrol-1 (2)	TP	0.9621	0.0012	0.0002	0.0305	0.0046	0.0014
22	New Blsens-rprhid_control	New Blsens-rprhid_control (n1)	newBLsens-rprhidcontrol-1 (58)	TP	0.9863	0	0	0.0118	0.0016	0.0002
22	New Blsens-rprhid_control	New Blsens-rprhid_control (n1)	newBLsens-rprhidcontrol-1 (6)	CB2	0.2705	0	0	0.6238	0.0844	0.0213
22	New Blsens-rprhid_control	New Blsens-rprhid_control (n1)	newBLsens-rprhidcontrol-1 (65)	TP	0.9298	0.0187	0.001	0.0437	0.0059	0.0008
22	New Blsens-rprhid_control	New Blsens-rprhid_control (n1)	newBLsens-rprhidcontrol-1 (7)	CB2	0.0012	0	0	0.8658	0.1172	0.0159
22	New Blsens-rprhid_control	New Blsens-rprhid_control (n1)	newBLsens-rprhidcontrol-1 (8)	TP	0.9286	0.0017	0	0.06	0.0086	0.0012
22	New Blsens-rprhid_control	New Blsens-rprhid_control (n1)	newBLsens-rprhidcontrol-1 (9)	TP	0.9582	0.0009	0.0005	0.0285	0.0104	0.0014
22	New Blsens-rprhid_control	New Blsens-rprhid_control (n2)	newBL-rprhidcontrol-2 (0)	TP	0.9928	0	0	0.0062	0.0008	0.0001
22	New Blsens-rprhid_control	New Blsens-rprhid_control (n2)	newBL-rprhidcontrol-2 (1)	TP	0.5527	0	0.0034	0.0002	0.3922	0.0515
22	New Blsens-rprhid_control	New Blsens-rprhid_control (n2)	newBL-rprhidcontrol-2 (2)	TP	0.8017	0	0	0.1692	0.0249	0.0041
22	New Blsens-rprhid_control	New Blsens-rprhid_control (n2)	newBL-rprhidcontrol-2 (4)	TP	0.8516	0.0673	0	0.0629	0.016	0.0022
22	New Blsens-rprhid_control	New Blsens-rprhid_control (n2)	newBL-rprhidcontrol-2 (5)	TP	0.9688	0.0013	0	0.0249	0.0034	0.0017
22	New Blsens-rprhid_control	New Blsens-rprhid_control (n2)	newBL-rprhidcontrol-2 (6)	TP	0.9636	0	0.0138	0.0195	0.0026	0.0004
22	New Blsens-rprhid_control	New Blsens-rprhid_control (n2)	newBL-rprhidcontrol-2 (7)	TP	0.9445	0.0163	0	0.0287	0.0092	0.0013
22	New Blsens-rprhid_control	New Blsens-rprhid_control (n2)	newBL-rprhidcontrol-2 (8)	TP	0.9647	0.0003	0	0.0304	0.0041	0.0006
22	New Blsens-rprhid_control	New Blsens-rprhid_control (n2)	newBL-rprhidcontrol-2 (9)	TP	0.5059	0.3162	0	0.1462	0.0279	0.0038
22	New Blsens-rprhid_control	New Blsens-rprhid_control (n2)	newBLsens-rprhidcontrol-2 (0)	CB2	0.0323	0	0	0.8389	0.1135	0.0154
22	New Blsens-rprhid_control	New Blsens-rprhid_control (n2)	newBLsens-rprhidcontrol-2 (1)	TP	0.8479	0.0715	0	0.0699	0.0095	0.0013
22	New Blsens-rprhid_control	New Blsens-rprhid_control (n2)	newBLsens-rprhidcontrol-2 (2)	TP	0.8309	0.0015	0	0.0098	0.1504	0.0074
22	New Blsens-rprhid_control	New Blsens-rprhid_control (n2)	newBLsens-rprhidcontrol-2 (3)	TP	0.8977	0	0	0.0003	0.089	0.0129
22	New Blsens-rprhid_control	New Blsens-rprhid_control (n2)	newBLsens-rprhidcontrol-2 (4)	TP	0.9635	0	0	0.0313	0.0046	0.0006
22	New Blsens-rprhid_control	New Blsens-rprhid_control (n2)	newBLsens-rprhidcontrol-2 (5)	TP	0.6866	0.2779	0	0	0.0312	0.0043
22	New Blsens-rprhid_control	New Blsens-rprhid_control (n2)	newBLsens-rprhidcontrol-2 (6)	TP	0.9522	0.0001	0	0.0175	0.0258	0.0044
22	New Blsens-rprhid_control	New Blsens-rprhid_control (n2)	newBLsens-rprhidcontrol-2 (7)	TP	0.9922	0	0	0.0068	0.0009	0.0001
22	New Blsens-rprhid_control	New Blsens-rprhid_control (n2)	newBLsens-rprhidcontrol-2 (8)	CB2	0.0142	0	0	0.8546	0.1157	0.0156
22	New Blsens-rprhid_control	New Blsens-rprhid_control (n2)	newBLsens-rprhidcontrol-2 (9)	TP	0.4813	0.4377	0.0002	0.0692	0.0102	0.0014
22	New BLsens-rprhid_control	New BLsens-rprhid_control (n3)	newBlsens-rprhidcontrol-4 (0)	TP	0.5274	0	0	0.4097	0.0554	0.0075
22	New BLsens-rprhid_control	New BLsens-rprhid_control (n3)	newBlsens-rprhidcontrol-4 (2)	TP	0.9151	0.0172	0	0.0553	0.0109	0.0015
22	New BLsens-rprhid_control	New BLsens-rprhid_control (n3)	newBlsens-rprhidcontrol-4 (3)	TP	0.6044	0.0021	0	0.2946	0.0914	0.0075
22	New BLsens-rprhid_control	New BLsens-rprhid_control (n3)	newBlsens-rprhidcontrol-4 (4)	TP	0.9059	0	0.0002	0.0809	0.011	0.002
22	New BLsens-rprhid_control	New BLsens-rprhid_control (n3)	newBlsens-rprhidcontrol-4 (5)	TP	0.9692	0.0174	0	0.009	0.0039	0.0005
22	New BLsens-rprhid_control	New BLsens-rprhid_control (n3)	newBlsens-rprhidcontrol-4 (6)	TP	0.5868	0.3744	0	0.0316	0.0063	0.0008
22	New BLsens-rprhid_control	New BLsens-rprhid_control (n3)	newBlsens-rprhidcontrol-4 (7)	TP	0.45	0.2964	0.2189	0.03	0.0041	0.0005
22	New BLsens-rprhid_control	New BLsens-rprhid_control (n3)	newBlsens-rprhidcontrol-4 (8)	CB2	0.1134	0	0	0.7629	0.1091	0.0146
22	New BLsens-rprhid_control	New BLsens-rprhid_control (n3)	newBlsens-rprhidcontrol-4 (9)	TP	0.9976	0	0	0.0021	0.0003	0
22	New Blsens-rprhid_control	New Blsens-rprhid_control (n4)	newBL-rprhidcontrol-4 (0)	TP	0.958	0.0004	0.0331	0.0072	0.0011	0.0002
22	New Blsens-rprhid_control	New Blsens-rprhid_control (n4)	newBL-rprhidcontrol-4 (1)	TP	0.9803	0.0003	0	0.0168	0.0023	0.0003
22	New Blsens-rprhid_control	New Blsens-rprhid_control (n4)	newBL-rprhidcontrol-4 (2)	P	0.3327	0.548	0.0245	0.0475	0.0075	0.0399
22	New Blsens-rprhid_control	New Blsens-rprhid_control (n4)	newBL-rprhidcontrol-4 (3)	TP	0.8613	0	0	0.1202	0.0163	0.0023
22	New Blsens-rprhid_control	New Blsens-rprhid_control (n4)	newBL-rprhidcontrol-4 (4)	P	0.3708	0.5664	0.0117	0.0443	0.006	0.0008
22	New Blsens-rprhid_control	New Blsens-rprhid_control (n4)	newBL-rprhidcontrol-4 (5)	TP	0.9001	0.0157	0.0086	0.0654	0.0089	0.0012
22	New Blsens-rprhid_control	New Blsens-rprhid_control (n4)	newBL-rprhidcontrol-4 (8)	TP	0.9889	0	0	0.0096	0.0013	0.0002
22	New Blsens-rprhid_control	New Blsens-rprhid_control (n4)	newBL-rprhidcontrol-4 (9)	TP	0.8536	0.0549	0	0.0233	0.0504	0.0178
33	New BLsens-rprhid	New BLsens-rprhid (n1)	newBL-rprhid-2 (1)	TP	0.999	0	0.0008	0	0.0001	0
33	New BLsens-rprhid	New BLsens-rprhid (n1)	newBL-rprhid-2 (2)	TP	0.7001	0.1007	0	0.1726	0.0234	0.0032
33	New BLsens-rprhid	New BLsens-rprhid (n1)	newBL-rprhid-2 (4)	CB2	0.251	0.002	0.0181	0.6317	0.0855	0.0116
33	New BLsens-rprhid	New BLsens-rprhid (n1)	newBL-rprhid-2 (5)	CB2	0.0844	0	0	0.7896	0.1115	0.0145
33	New BLsens-rprhid	New BLsens-rprhid (n1)	newBL-rprhid-2 (7)	TP	0.8647	0.0877	0	0.0307	0.0148	0.0021
33	New BLsens-rprhid	New BLsens-rprhid (n1)	newBL-rprhid-2 (8)	TP	0.8937	0.0204	0	0.066	0.0175	0.0025
33	New BLsens-rprhid	New BLsens-rprhid (n1)	newBLsens-rprhid-1 (1)	TP	0.9998	0	0.0002	0	0	0
33	New BLsens-rprhid	New BLsens-rprhid (n1)	newBLsens-rprhid-1 (2)	TP	0.8259	0.0048	0	0.0491	0.1055	0.0147
33	New BLsens-rprhid	New BLsens-rprhid (n1)	newBLsens-rprhid-1 (5)	TP	0.5714	0.0639	0	0.3154	0.0434	0.0059
33	New BLsens-rprhid	New BLsens-rprhid (n2)	newBL-rprhid-3 (1)	TP	0.9956	0.0002	0.004	0.0002	0	0
33	New BLsens-rprhid	New BLsens-rprhid (n2)	newBL-rprhid-3 (3)	TP	0.9938	0	0.0058	0.0003	0.0001	0
33	New BLsens-rprhid	New BLsens-rprhid (n2)	newBLsens-rprhid-2 (1)	TP	0.9562	0.0042	0	0.0344	0.0046	0.0006
33	New BLsens-rprhid	New BLsens-rprhid (n2)	newBLsens-rprhid-2 (3)	TP	0.7295	0	0	0.2345	0.0317	0.0043
33	New BLsens-rprhid	New BLsens-rprhid (n2)	newBLsens-rprhid-2 (5)	TP	0.986	0.0018	0.0115	0.0006	0.0001	0
33	New BLsens-rprhid	New BLsens-rprhid (n2)	newBLsens-rprhid-2 (6)	TP	0.9767	0.0017	0.0203	0.001	0.0003	0
33	New BLsens-rprhid	New BLsens-rprhid (n2)	newBLsens-rprhid-2 (8)	TP	0.9641	0	0.0194	0.0142	0.002	0.0003
33	New BLsens-rprhid	New BLsens-rprhid (n3)	newBL-rprhid-4 (2)	TP	0.9965	0	0.0018	0.0014	0.0002	0
33	New BLsens-rprhid	New BLsens-rprhid (n3)	newBL-rprhid-4 (3)	TP	0.7208	0.176	0	0.0895	0.0121	0.0016
33	New BLsens-rprhid	New BLsens-rprhid (n3)	newBL-rprhid-4 (4)	TP	0.9893	0.0015	0.0088	0.0004	0.0001	0
33	New BLsens-rprhid	New BLsens-rprhid (n3)	newBL-rprhid-4 (6)	TP	0.757	0.0002	0.2296	0.0114	0.0015	0.0002
33	New BLsens-rprhid	New BLsens-rprhid (n3)	newBLsens-rprhid-3 (4)	TP	0.6182	0.0228	0	0.3066	0.0415	0.011
33	New BLsens-rprhid	New BLsens-rprhid (n3)	newBLsens-rprhid-3 (9)	TP	0.9224	0.0604	0	0.015	0.002	0.0003
33	New BLsens-rprhid	New BLsens-rprhid (n4)	newBLsens-rprhid-4 (360)	TP	0.9391	0.0006	0.0571	0.0028	0.0004	0.0001
