# Supplementary material for: Optimal searching behaviour generated intrinsically by the central pattern generator for locomotion
Source: eLife journal article supplement (doi:10.7554/elife.50316), 2019-11-01
Supplement: supp [file elife-50316-supp-v1.zip › elife_poa_e50316_Supplementary_file_7.xlsx]

## Sheet: Sheet1
Supplementary File 7		Frequency test
		N tracks
Frame frequency (Hz)	N tracks	TP	E	U	TP mu	SD	Median
3 Hz	12	8	1	3	1.7	0.34	1.785
5 Hz	12	7	2	3	2.06	0.5	2.075
7.5 Hz	12	6	1	5	1.56	0.32	1.499
15 Hz	12	8	2	2	1.81	0.36	1.837
