# Supplementary figures and images for: Optimal searching behaviour generated intrinsically by the central pattern generator for locomotion
Source: eLife journal article supplement (doi:10.7554/elife.50316), 2019-11-01

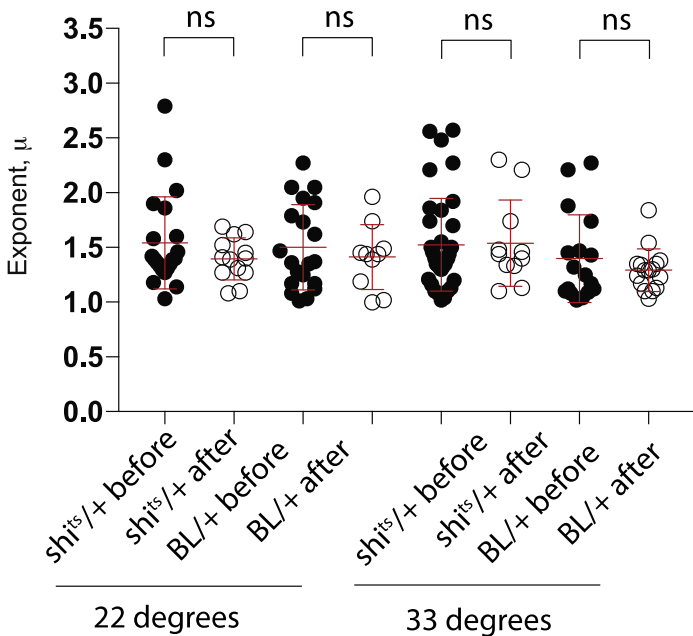

Supplement: supp [file elife-50316-supp-v1.zip]

**A**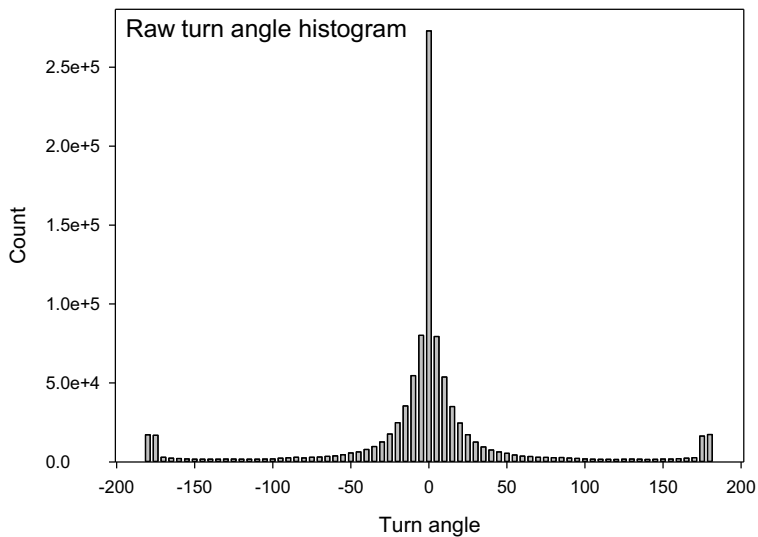**B**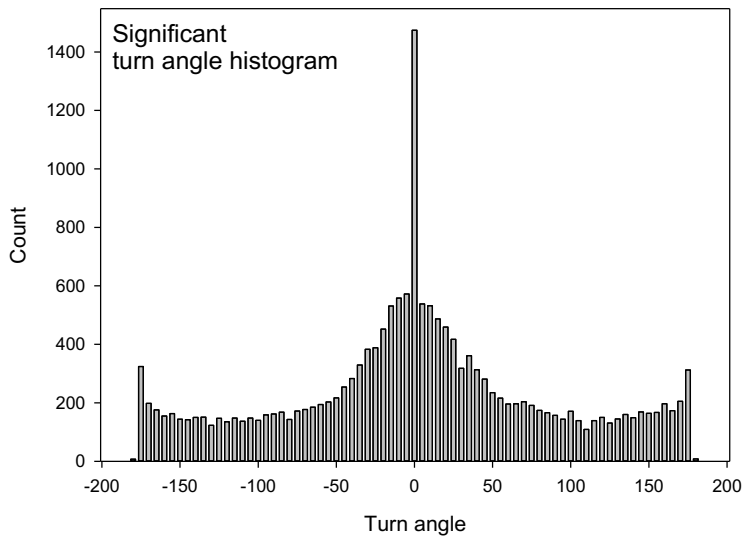

Supplement: supp [file elife-50316-supp-v1.zip]

**A**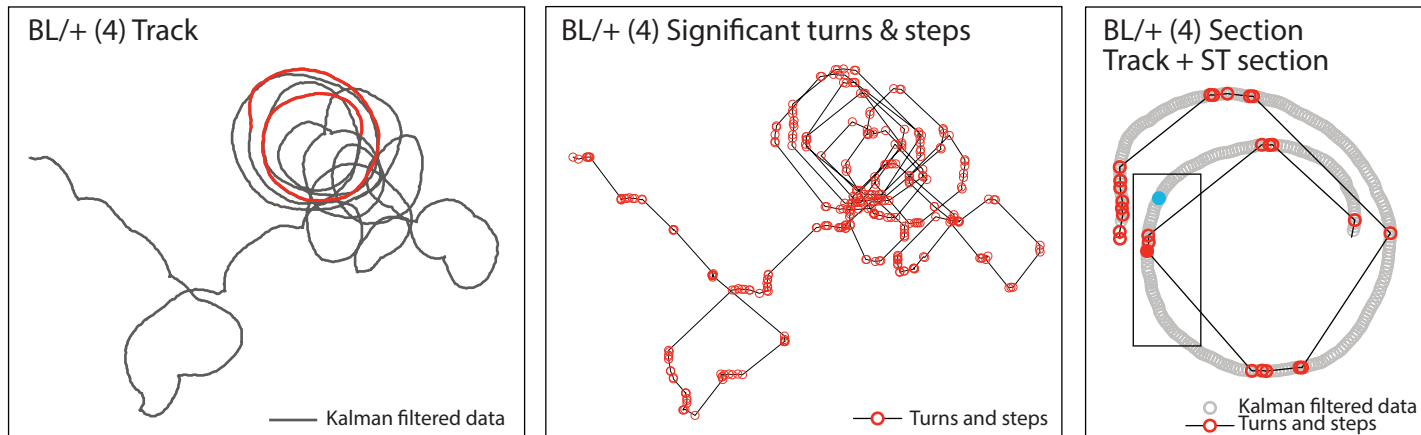**B**

Crawl in a curve

Small turn

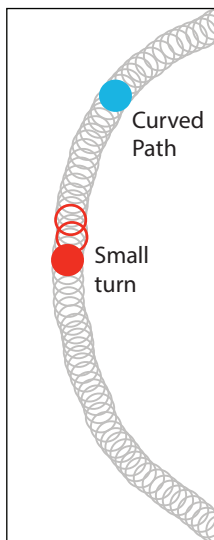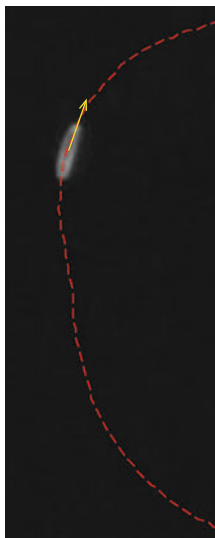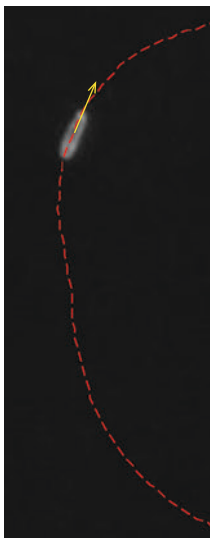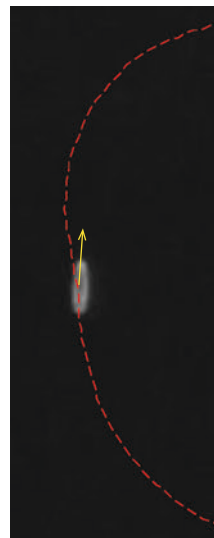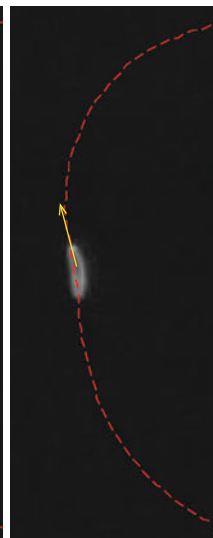

Supplement: supp [file elife-50316-supp-v1.zip]
